# Supplementary material for: Molecular Markers Distinguishing T Cell Subtypes With TSDR Strand-Bias Methylation
Source: PubMed Central journal article supplement (PMC6230625; doi:10.3389/fimmu.2018.02540), 2018-11-05
Supplement: Data_Sheet_1.pdf [file Data_Sheet_1.pdf]

## *Supplementary Material*

### **Molecular markers distinguishing T cell subtypes with TSDR strand-bias methylation**

Ekaterina Minskaia<sup>1,2‡</sup>, Barbara C. Saraiva<sup>1</sup>, Maria M.V. Soares<sup>1</sup>, Rita I. Azevedo<sup>1</sup>, Ruy M. Ribeiro<sup>3</sup>, Saumya D. Kumar<sup>1</sup>, Ana Vieira<sup>1,4</sup> and João F. Lacerda<sup>1‡\*</sup>

<sup>1</sup> Instituto de Medicina Molecular, Faculdade de Medicina da Universidade de Lisboa, Lisbon, Portugal.

<sup>2</sup> Present address: Advanced Therapeutics, Scottish National Blood Transfusion Service, The Jack Copland Centre, Edinburgh, Scotland, UK

<sup>3</sup> Departamento de Biomatemática, Faculdade de Medicina da Universidade de Lisboa, Lisbon, Portugal

<sup>4</sup> Present address: Flow Cytometry Platform (FCP), Champalimaud Foundation, Lisbon, Portugal.

‡ These authors share senior authorship

**\*Correspondence:**

Corresponding Author

[jlacerda@medicina.ulisboa.pt](mailto:jlacerda@medicina.ulisboa.pt)

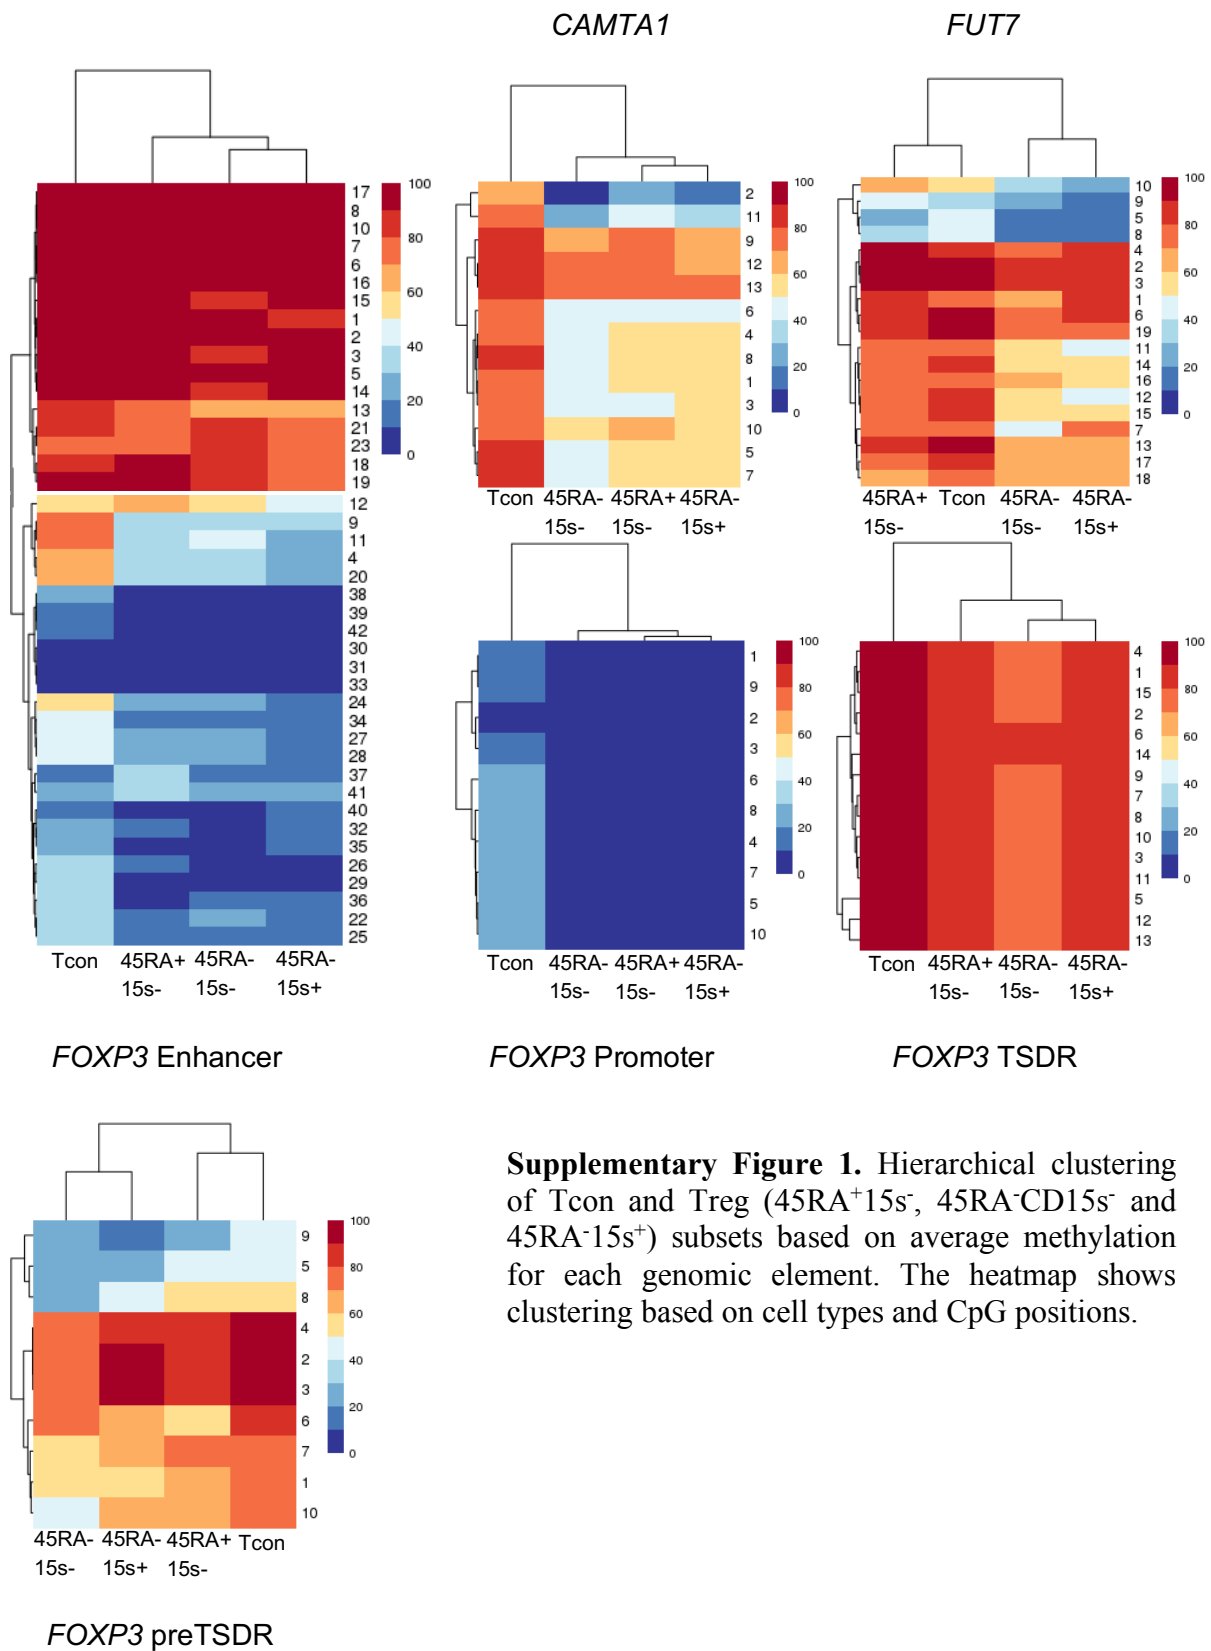

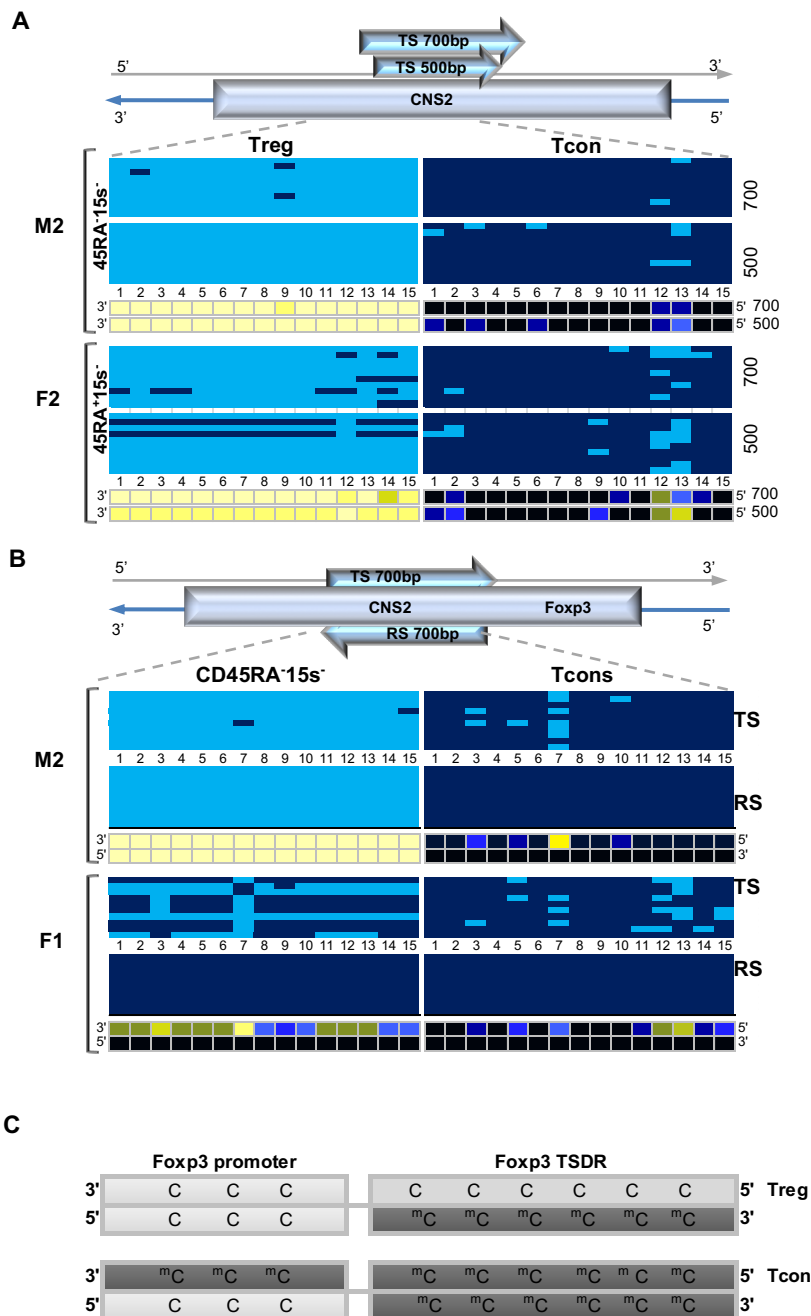

**Supplementary Figure 2.** Strand-specific methylation bias within the *FOXP3* TSDR region. (A). Methylation patterns of the top strand (TS) within TSDR of Treg and Tcon cells in ‘conventional’ (M2, top panel) and ‘unconventional’ (F2, lower panel) donors based on two amplicons, TS700bp and TS500bp. (B). Methylation patterns of the top strand (TS, upper panels) and reverse strand (RS, lower panels) within TSDR of CD45RA<sup>+</sup>CD15<sup>-</sup> and Tcon cells of donors M2 and F1. CpGs 1-15 are numbered relative to the 5’-3’ direction of the coding (reverse) strand. Each horizontal line represents DNA from one cell with unmodified C in light blue and <sup>m</sup>C in dark blue. Methylation percentage for each CpG site was calculated based on the number of <sup>m</sup>Cs in a total of 10 and summarised in panels below. (C). Schematic presentation of ‘unconventional’ strand-bias methylation pattern in *FOXP3* promoter and TSDR of Treg and Tcon cells.

A

CAMTA

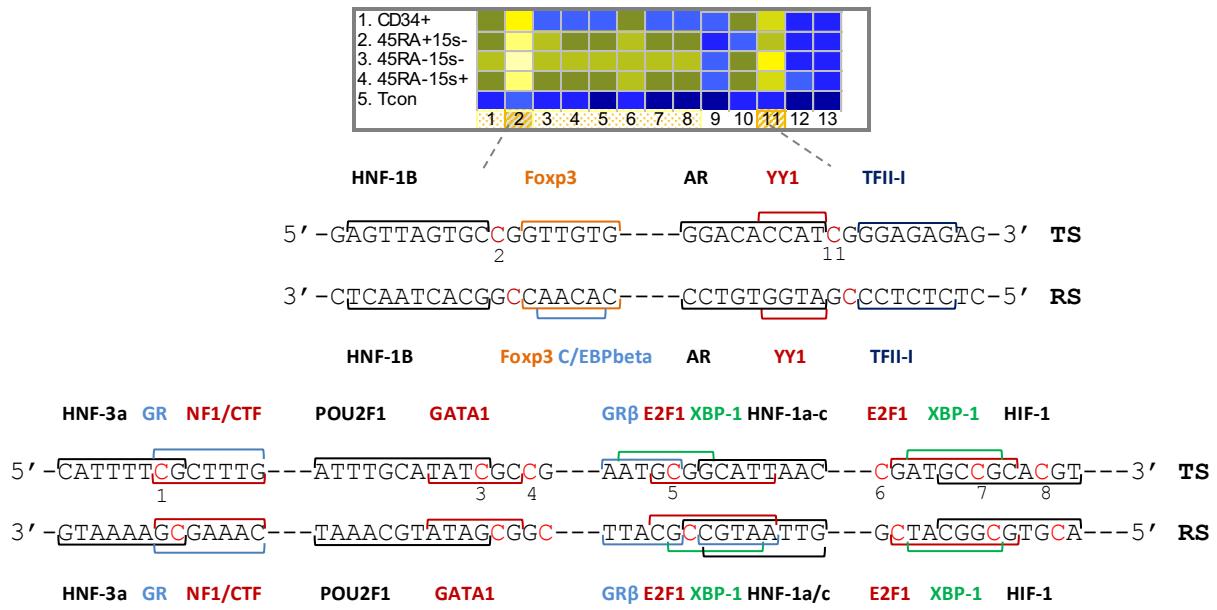

B

FUT7

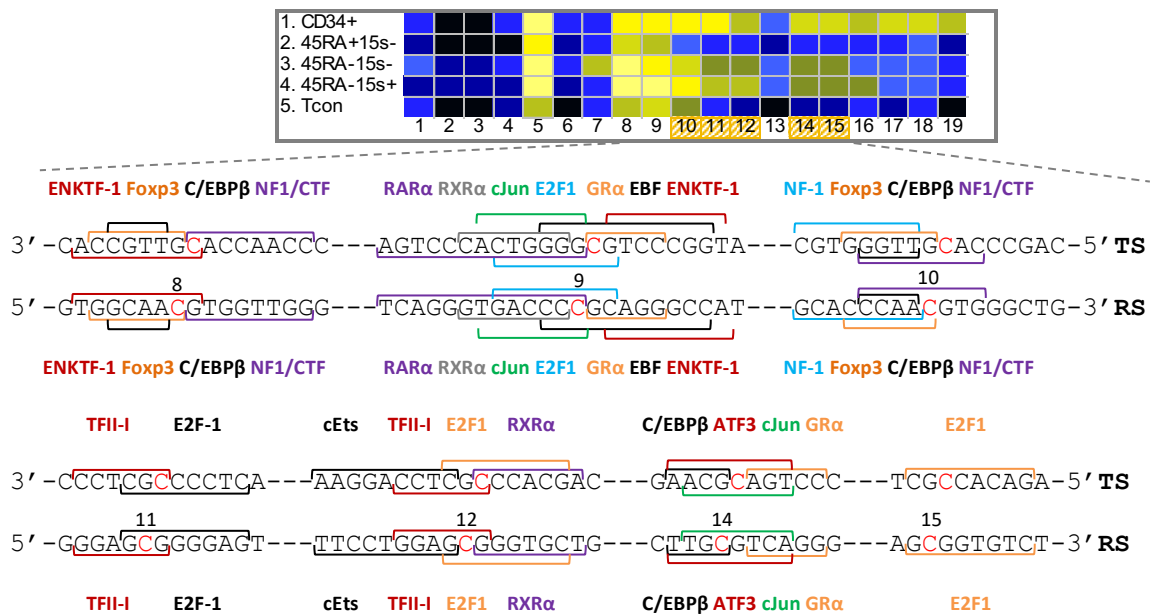

**Supplementary Figure 3.** Predicted TF binding sites containing or immediately adjacent to CpGs differentially methylated in *CAMTA1* and *FUT7* promoter of CD34+ cells and T lymphocyte subsets. Average methylation patterns for *CAMTA1* (A and Figure 2C) and *FUT7* (B and Figure 3C) are presented to indicate hypomethylated CpG sites. Coding strands of *CAMTA1* (TS) and *FUT7* (RS) are shown in the 5'-3' direction, Cs within 5'-CpG-3' are in red and numbered relative to the 5'-3' direction of the coding strand, TF recognition sequences are colour-coordinated with respective TFs. TS – top strand, RS – reverse strand

A

Foxp3 preTSDR

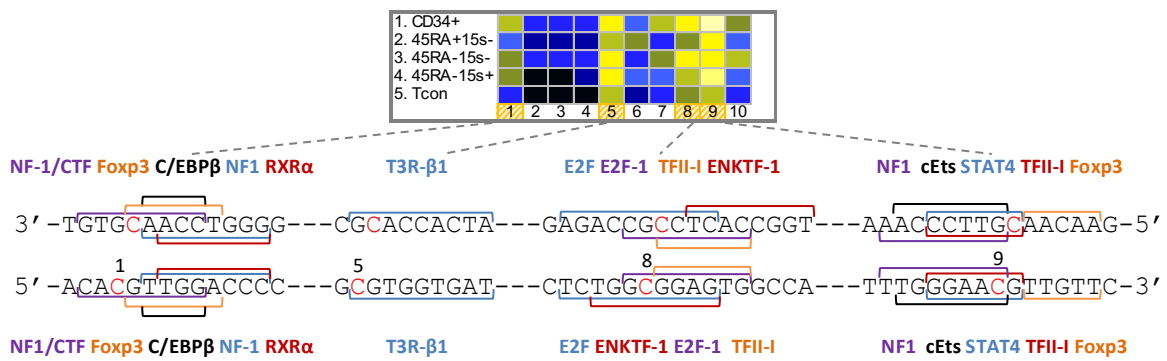

B

Foxp3 Enhancer

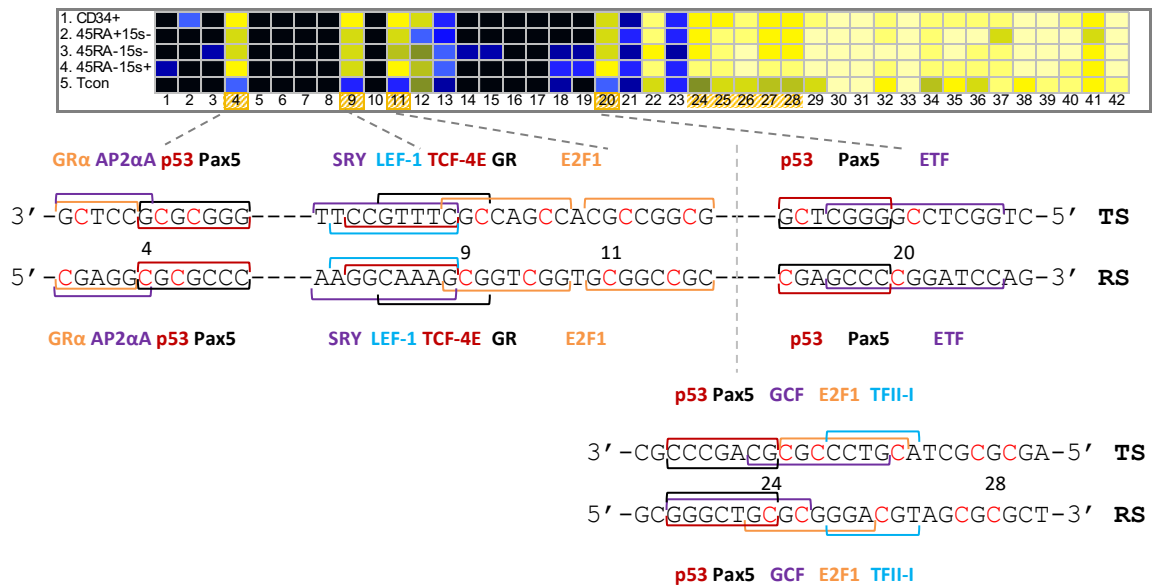

**Supplementary Figure 4.** Predicted TF binding sites containing or immediately adjacent to CpGs differentially methylated in *FOXP3* preTSDR and enhancer regions of CD34<sup>+</sup> cells and T lymphocyte subsets. Average methylation patterns for *FOXP3* preTSDR (A and Figure 5C) and enhancer (B and Figure 4C) are presented to indicate hypomethylated CpG sites. Coding (reverse) strands (RS) are shown in the 5'-3' direction, Cs within 5'-CpG-3' are in red and numbered relative to the 5'-3' direction of the coding strand, TF recognition sequences are colour-coordinated with respective TFs.

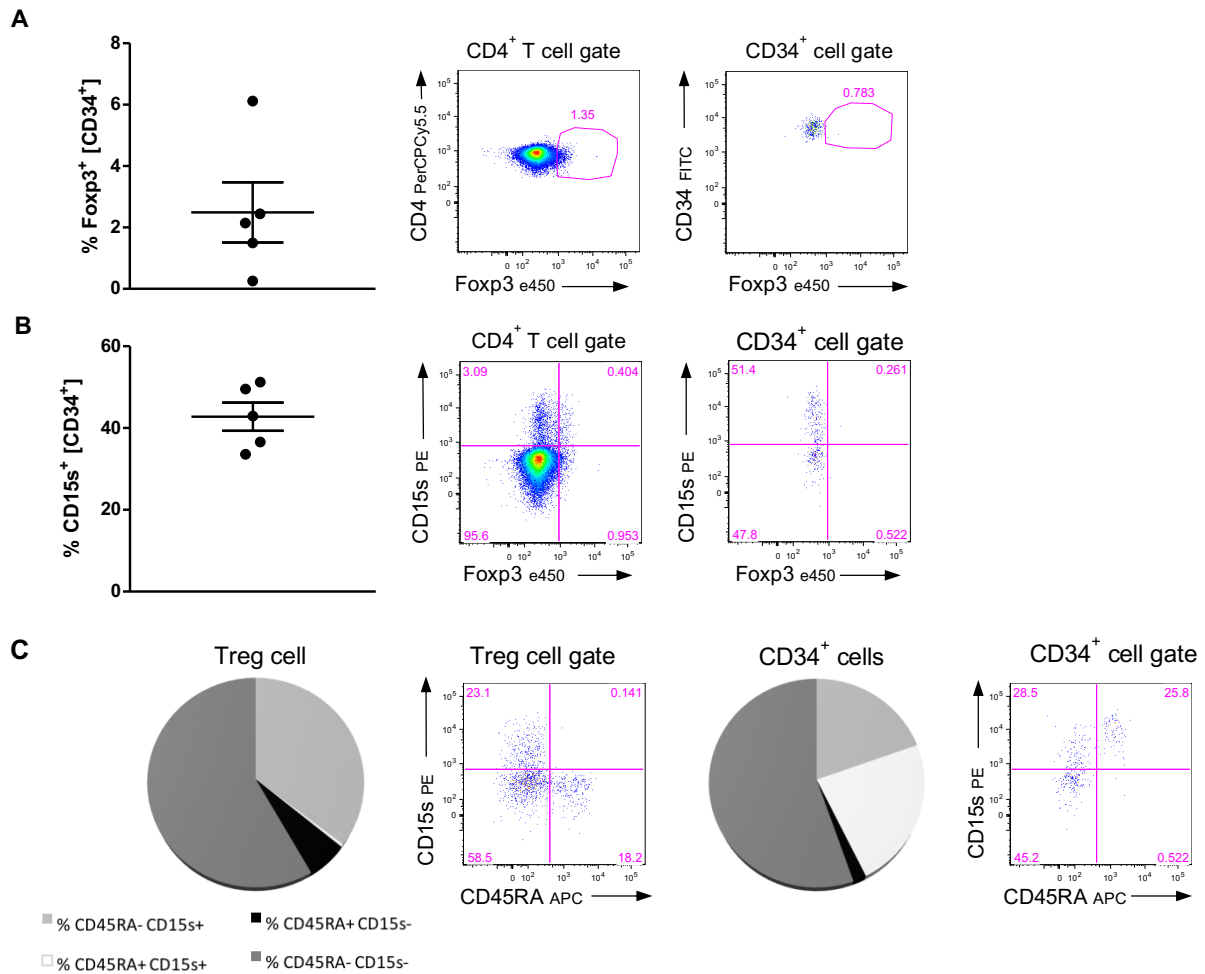

**Supplementary Figure 5.** Phenotypic analysis of CD34<sup>+</sup> cells by flow cytometry. Whole blood samples from donors M3, M6, F1, F2 and F4 were surface stained for CD34, CD3, CD4, CD25, CD127, CD45RA and CD15s. Following fixation and permeabilization, cells were incubated with anti-Foxp3 antibody. (A). The frequency of Foxp3<sup>+</sup> cells was determined within the CD34<sup>+</sup> population. Dot plots from a representative donor (M6) are shown, illustrating the expression of Foxp3 within CD4 T cells and CD34<sup>+</sup> cells. (B). The frequency of CD15s<sup>+</sup> cells was determined within the CD34<sup>+</sup> population. Dot plots from a representative donor (M6) are shown, illustrating the co-expression of CD15s and Foxp3 within CD4 T cells and CD34<sup>+</sup> cells. In the scatter plots, each symbol represents an individual (n=5), mean values are shown as horizontal lines and error bars represent the standard error of the mean. (C). The frequency of CD45RA/CD15s subsets was determined within Treg and CD34<sup>+</sup> cells. Pie charts show the average frequency of each subset within Treg and CD34<sup>+</sup> cells (n=5). Dot plots from a representative donor (M6) are shown, illustrating the distribution of CD45RA/CD15s subsets within Treg and CD34<sup>+</sup> cells.

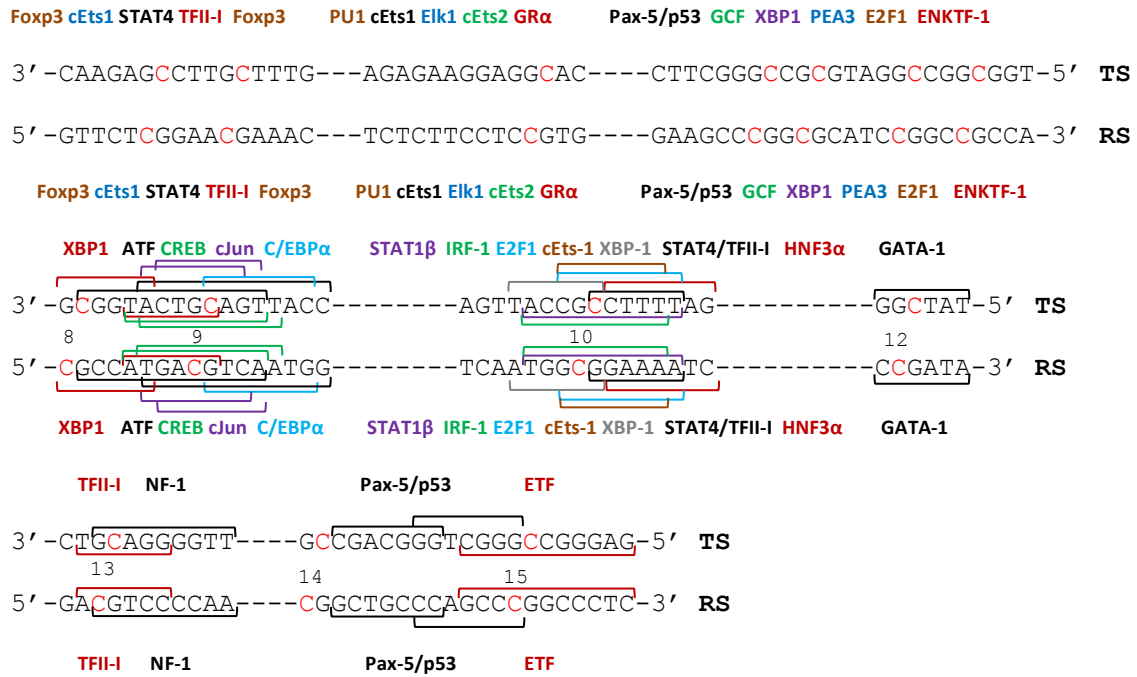

**Supplementary Figure 6.** Differential binding of specific TFs to cytosines within CpG sites located on FOXP3 TSDR. While mapping to both strands, the predicted DNA binding sites of some TFs did not contain a cytosine (C) within their recognition sequences on one of the strands. Coding (reverse) strand (RS) is shown in the 5'-3' direction, Cs within 5'-CpG-3' are in red and numbered relative to 5'-3' direction of the coding strand, TF recognition sequences are colour-coordinated with respective TFs.

| Primer Name                                   | Primer Sequence, 5'-3'                                                                                                                  | Amplicon size, bp | Strand                     |
|-----------------------------------------------|-----------------------------------------------------------------------------------------------------------------------------------------|-------------------|----------------------------|
| CAMTA Fw<br>CAMTA Rev                         | <b>GCGCCA<b>TGG</b></b> AATAAGTAAAGAAAAATTTAGTTGGTAATAAAA <b>TAAAGGG</b><br><b>GCGA<b>TGCAT</b></b> AACAATCTCATCTAAATCAACCTATAACAAACACC | 470               | top (+)<br>top (+)         |
| 1FUT7 Fw<br>1FUT7 Rev                         | <b>GCGCCA<b>TGG</b></b> TAATTTTAATATTTTGGGAGGTTGAAATTTGTGG<br><b>GCGA<b>TGCATT</b></b> CACCCTAAACCCCAACCAACCAACACC                      | 500               | reverse (+)<br>reverse (+) |
| 2FUT7 Fw<br>2FUT7 Rev                         | <b>GCGCCA<b>TGG</b></b> GTGGTTGGGTGAAGAGGTTGATGG<br><b>GCGA<b>TGCAT</b></b> CCCTTAATATCTTCCCACAAAAACC                                   | 454               | reverse (+)<br>reverse (+) |
| Foxp3 Enhancer Fw<br>Foxp3 Enhancer Rev       | <b>GCGCCA<b>TGG</b></b> GGTGTGGTTTAGAAAGTGT<br><b>GCGA<b>TGCAT</b></b> AAAAATTTTACCTAATCCCCACATTTT                                      | 497               | reverse (+)<br>reverse (+) |
| Foxp3 Promoter RS Fw<br>Foxp3 Promoter RS Rev | <b>GCGCCA<b>TGG</b></b> TTGTTTGGTTTCGGGTTGGTTTTGTGATTTATTTTAG<br><b>GCGA<b>TGCAT</b></b> ACAAAAAATAACCACTA                              | 451               | reverse (+)<br>reverse (+) |
| Foxp3 Promoter TS Fw<br>Foxp3 Promoter TS Rev | <b>GCGCCA<b>TGG</b></b> TGTTATTTTTTTAATGGGGTTTATTTGGTAGGGG<br><b>GCGA<b>TGCAT</b></b> CAAATCTCTTTCTTTCCCAAAAAACC                        | 582               | top (-)<br>top (-)         |
| Foxp3 preTSDR Fw<br>Foxp3 preTSDR Rev         | <b>GCGCCA<b>TGG</b></b> TTTTTTAGTATTTAGAAGGGGAAGGGGAATTTGGG<br><b>GCGA<b>TGCAT</b></b> AAAACCCCTAAAACTTCAAATAATATAACACCAAAAC            | 700               | reverse (+)<br>reverse (+) |
| Foxp3 TSDR TS700 Fw<br>Foxp3 TSDR TS700 Rev   | <b>GCGCCA<b>TGG</b></b> TATGTGGGATGGTTTGTATTTAGTAAAGTATAG<br><b>GCGA<b>TGCAT</b></b> TTTAAACACCAAAAAACTAACCTACACATAC                    | 699               | top (-)<br>top (-)         |
| Foxp3 TSDR TS500 Fw<br>Foxp3 TSDR TS500 Rev   | <b>GCGCCA<b>TGG</b></b> GGATATGGAGATGATTTGTTGGGGTAGAGG<br><b>GCGA<b>TGCAT</b></b> CTAACACTCTCAAACCTCAAACCTAAATCCTC                      | 474               | top (-)<br>top (-)         |
| Foxp3 TSDR RS Fw<br>Foxp3 TSDR RS Rev         | <b>GCGCCA<b>TGG</b></b> TTAGGGATATTGGTTTATATATATTGAGATTTTGG<br><b>GCGA<b>TGCAT</b></b> CCCCAAACACATATAAAATAACCTAACTCAACAAAAAC           | 700               | reverse (+)<br>reverse (+) |

**Supplementary Table 1.** Bisulphite DNA strand-specific primers used for amplification of *CAMTA1*, *FUT7* and *FOXP3* gene regions for detection of methylation status. Coding strand is denoted as “+” (sense) and template strand is denoted as “-“ (antisense). Nucleotides comprising restriction sites NcoI (forward primers, Fw) and NsiI (reverse primers, Rev) used for directional cloning are in bold italics



| Gene region                   | Position, 5'-3'         | Primer position, 5'-3'                                    | Amplicon size, bp | Strand |
|-------------------------------|-------------------------|-----------------------------------------------------------|-------------------|--------|
| <b>CAMTA1, Ch1</b>            |                         |                                                           |                   |        |
| <i>CAMTA1</i> intronic region | 6,965,651-6,966,120     | Fw 6,965,651-6,965,689<br>Rev 6,966,120-6,966,083         | 470               | +      |
| <b>FUT7, Ch9</b>              |                         |                                                           |                   |        |
| <i>FUT7</i> promoter 1        | 137,033,577-137,033,078 | Fw 137,033,577-137,033,551<br>Rev 137,033,078-137,033,105 | 500               | +      |
| <i>FUT7</i> promoter 2        | 137,033,153-137,032,701 | Fw 137,033,153-137,033,131<br>Rev 137,032,701-137,033,725 | 454               | +      |
| <b>FOXP3, ChX</b>             |                         |                                                           |                   |        |
| <i>FOXP3</i> Enhancer         | 49,270,698-49,270,202   | Fw 49,270,698-49,270,676<br>Rev 49,270,202-49,270,228     | 497               | +      |
| <i>FOXP3</i> Promoter RS      | 49,265,128-49,264,678   | Fw 49,265,128-49,265,092<br>Rev 49,264,678-49,264,701     | 451               | +      |
| <i>FOXP3</i> Promoter TS      | 49,264,607-49,265,188   | Fw 49,264,607-49,264,643<br>Rev 49,265,188-49,265,156     | 582               | -      |
| <i>FOXP3</i> preTSDR          | 49,261,770-49,261,071   | Fw 49,261,770-49,261,734<br>Rev 49,261,071-49,261,109     | 700               | +      |
| <i>FOXP3</i> TSDR TS700       | 49,260,531-49,261,229   | Fw 49,260,531-49,260,563<br>Rev 49,261,229-49,261,197     | 699               | -      |
| <i>FOXP3</i> TSDR TS500       | 49,260,579-49,261,052   | Fw 49,260,579-49,260,611<br>Rev 49,261,052-49,261,019     | 474               | -      |
| <i>FOXP3</i> TSDR RS          | 49,261,221-49,260,522   | Fw 49,261,221-49,261,186<br>Rev 49,260,522-49,260,559     | 700               | +      |

**Supplementary Table 2.** *CAMTA1*, *FUT7* and *FOXP3* gene regions used in the study of methylation status of the five cell populations. Fw – forward primer, Rev – reverse primer, TS-top strand, RS-reverse strand, “+” - sense (coding) strand, “-“ – antisense (template) strand.

CAMTA

| Donor         |     | M1            |      |      |      |      | M2                |      |      |      |      | M3  |     |     |     |     | M4                   |      |      |      |      |
|---------------|-----|---------------|------|------|------|------|-------------------|------|------|------|------|-----|-----|-----|-----|-----|----------------------|------|------|------|------|
| CpG           | nt  | #1            | #2   | #3   | #4   | #5   | #1                | #2   | #3   | #4   | #5   | #1  | #2  | #3  | #4  | #5  | #1                   | #2   | #3   | #4   | #5   |
| 1             | 1   | N/A           | 25   | 5    | 100  | 70   | N/A               | 50   | 5    | 10   | 80   | N/A | 35  | 5   | 10  | 70  | 25                   | 30   | 25   | 30   | 70   |
| 2             | 28  | N/A           | 10   | 15   | 70   | 65   | N/A               | 40   | 0    | 20   | 70   | N/A | 35  | 5   | 5   | 75  | 15                   | 40   | 0    | 5    | 70   |
| 3             | 57  | N/A           | 5    | 20   | 75   | 90   | N/A               | 45   | 0    | 20   | 85   | N/A | 35  | 10  | 30  | 80  | 55                   | 45   | 0    | 30   | 65   |
| 4             | 60  | N/A           | 15   | 20   | 100  | 85   | N/A               | 45   | 0    | 15   | 95   | N/A | 45  | 10  | 20  | 70  | 55                   | 45   | 0    | 30   | 90   |
| 5             | 89  | N/A           | 25   | 20   | 100  | 100  | N/A               | 45   | 0    | 25   | 100  | N/A | 50  | 10  | 30  | 90  | 60                   | 45   | 5    | 30   | 100  |
| 6             | 152 | N/A           | 10   | 15   | 95   | 75   | N/A               | 35   | 0    | 5    | 85   | N/A | 15  | 5   | 15  | 85  | 40                   | 25   | 0    | 30   | 65   |
| 7             | 158 | N/A           | 25   | 25   | 80   | 100  | N/A               | 70   | 5    | 15   | 100  | N/A | 40  | 5   | 30  | 95  | 50                   | 35   | 0    | 30   | 80   |
| 8             | 162 | N/A           | 25   | 20   | 100  | 95   | N/A               | 30   | 0    | 10   | 90   | N/A | 40  | 5   | 30  | 80  | 60                   | 35   | 10   | 40   | 85   |
| 9             | 237 | N/A           | 70   | 55   | 100  | 100  | N/A               | 85   | 55   | 90   | 95   | N/A | 70  | 70  | 95  | 90  | 85                   | 55   | 25   | 25   | 95   |
| 10            | 294 | N/A           | 80   | 65   | 80   | 85   | N/A               | 90   | 45   | 55   | 90   | N/A | 70  | 65  | 85  | 80  | 60                   | 45   | 15   | 25   | 85   |
| 11            | 317 | N/A           | 80   | 60   | 80   | 85   | N/A               | 95   | 45   | 90   | 95   | N/A | 90  | 55  | 90  | 90  | 55                   | 65   | 15   | 10   | 90   |
| 12            | 352 | N/A           | 95   | 90   | 100  | 95   | N/A               | 95   | 95   | 85   | 100  | N/A | 95  | 95  | 90  | 95  | 90                   | 65   | 15   | 25   | 80   |
| 13            | 354 | N/A           | 85   | 95   | 100  | 100  | N/A               | 100  | 95   | 100  | 100  | N/A | 100 | 100 | 100 | 90  | 90                   | 65   | 15   | 25   | 100  |
| Donor         |     | M5            |      |      |      |      | M6                |      |      |      |      | F1  |     |     |     |     | F2                   |      |      |      |      |
| CpG           | nt  | #1            | #2   | #3   | #4   | #5   | #1                | #2   | #3   | #4   | #5   | #1  | #2  | #3  | #4  | #5  | #1                   | #2   | #3   | #4   | #5   |
| 1             | 1   | 25            | 100  | 25   | 10   | 55   | 40                | 50   | 90   | 95   | 95   | 75  | 20  | 60  | 20  | 80  | 30                   | 45   | 50   | 20   | 45   |
| 2             | 28  | 15            | 5    | 5    | 0    | 40   | 0                 | 10   | 5    | 5    | 70   | 70  | 10  | 15  | 0   | 70  | 25                   | 20   | 25   | 20   | 35   |
| 3             | 57  | 40            | 90   | 20   | 5    | 55   | 40                | 55   | 90   | 95   | 90   | 90  | 10  | 65  | 20  | 75  | 30                   | 35   | 40   | 35   | 40   |
| 4             | 60  | 40            | 100  | 20   | 5    | 55   | 40                | 50   | 90   | 95   | 90   | 90  | 10  | 65  | 10  | 85  | 30                   | 50   | 35   | 25   | 40   |
| 5             | 89  | 40            | 100  | 20   | 5    | 55   | 40                | 50   | 90   | 95   | 100  | 90  | 15  | 70  | 10  | 95  | 30                   | 50   | 50   | 30   | 40   |
| 6             | 152 | 40            | 100  | 20   | 5    | 55   | 40                | 50   | 90   | 95   | 85   | 85  | 15  | 65  | 10  | 60  | 30                   | 50   | 25   | 20   | 35   |
| 7             | 158 | 40            | 100  | 20   | 5    | 60   | 40                | 55   | 95   | 95   | 95   | 90  | 25  | 75  | 10  | 90  | 35                   | 55   | 45   | 20   | 35   |
| 8             | 162 | 70            | 100  | 20   | 5    | 60   | 40                | 55   | 95   | 100  | 90   | 90  | 20  | 65  | 10  | 85  | 35                   | 50   | 40   | 25   | 40   |
| 9             | 237 | 50            | 100  | 25   | 10   | 60   | 40                | 75   | 95   | 100  | 100  | 90  | 40  | 70  | 25  | 80  | 25                   | 55   | 50   | 25   | 25   |
| 10            | 294 | 45            | 100  | 20   | 10   | 60   | 55                | 65   | 95   | 95   | 85   | 90  | 25  | 55  | 10  | 75  | 35                   | 45   | 35   | 25   | 40   |
| 11            | 317 | 50            | 5    | 20   | 0    | 50   | 25                | 35   | 5    | 10   | 70   | 65  | 30  | 30  | 10  | 75  | 35                   | 25   | 30   | 30   | 45   |
| 12            | 352 | 70            | 100  | 55   | 5    | 55   | 75                | 80   | 90   | 100  | 90   | 85  | 35  | 75  | 30  | 100 | 35                   | 60   | 30   | 45   | 50   |
| 13            | 354 | 70            | 100  | 55   | 10   | 55   | 75                | 80   | 90   | 100  | 80   | 75  | 30  | 75  | 30  | 85  | 40                   | 65   | 40   | 40   | 50   |
| Donor         |     | F3            |      |      |      |      | F4                |      |      |      |      | F5  |     |     |     |     | mean all donors      |      |      |      |      |
| CpG           | nt  | #1            | #2   | #3   | #4   | #5   | #1                | #2   | #3   | #4   | #5   | #1  | #2  | #3  | #4  | #5  | #1                   | #2   | #3   | #4   | #5   |
| 1             | 1   | 80            | 85   | 40   | 85   | 100  | 65                | 55   | 80   | 95   | 90   | 100 | 95  | 100 | 100 | 80  | 55                   | 53.6 | 44.1 | 52.3 | 75.9 |
| 2             | 28  | 60            | 45   | 25   | 40   | 90   | 5                 | 0    | 10   | 0    | 70   | 5   | 10  | 5   | 0   | 80  | 24.4                 | 20.5 | 10   | 15   | 66.8 |
| 3             | 57  | 75            | 80   | 70   | 85   | 95   | 65                | 55   | 85   | 95   | 95   | 95  | 90  | 100 | 100 | 75  | 61.3                 | 49.5 | 45.5 | 53.6 | 76.8 |
| 4             | 60  | 80            | 85   | 65   | 85   | 90   | 65                | 55   | 85   | 95   | 90   | 95  | 90  | 100 | 95  | 85  | 61.9                 | 53.6 | 44.5 | 52.3 | 79.5 |
| 5             | 89  | 80            | 85   | 65   | 85   | 100  | 65                | 55   | 85   | 95   | 100  | 95  | 95  | 100 | 100 | 90  | 62.5                 | 55.9 | 46.8 | 55   | 88.2 |
| 6             | 152 | 80            | 75   | 65   | 85   | 90   | 70                | 55   | 85   | 95   | 95   | 95  | 90  | 100 | 95  | 65  | 60                   | 47.3 | 42.7 | 50   | 72.3 |
| 7             | 158 | 75            | 85   | 75   | 85   | 100  | 70                | 55   | 90   | 95   | 100  | 95  | 95  | 100 | 100 | 90  | 61.9                 | 58.2 | 48.6 | 51.4 | 85.9 |
| 8             | 162 | 75            | 85   | 70   | 85   | 100  | 70                | 55   | 80   | 95   | 95   | 90  | 95  | 100 | 100 | 80  | 66.3                 | 53.6 | 45.9 | 54.5 | 81.8 |
| 9             | 237 | 70            | 80   | 80   | 85   | 95   | 70                | 55   | 95   | 95   | 100  | 100 | 95  | 100 | 100 | 85  | 66.3                 | 70.9 | 65.5 | 68.2 | 84.1 |
| 10            | 294 | 35            | 45   | 25   | 50   | 90   | 65                | 55   | 85   | 100  | 80   | 100 | 90  | 95  | 95  | 90  | 60.6                 | 64.5 | 54.5 | 57.3 | 78.2 |
| 11            | 317 | 45            | 50   | 20   | 40   | 85   | 5                 | 5    | 15   | 0    | 95   | 10  | 10  | 10  | 10  | 70  | 36.3                 | 44.5 | 27.7 | 33.6 | 77.3 |
| 12            | 352 | 75            | 85   | 100  | 85   | 100  | 80                | 55   | 100  | 100  | 100  | 100 | 95  | 100 | 100 | 95  | 76.3                 | 78.2 | 76.8 | 69.5 | 87.3 |
| 13            | 354 | 75            | 85   | 95   | 85   | 100  | 80                | 55   | 100  | 100  | 95   | 100 | 95  | 100 | 100 | 95  | 75.6                 | 78.2 | 78.2 | 71.8 | 86.4 |
| mean CpGs 1-8 |     |               |      |      |      |      |                   |      |      |      |      |     |     |     |     |     | 56.7 49 41 48 78.4   |      |      |      |      |
| mean all CpGs |     |               |      |      |      |      |                   |      |      |      |      |     |     |     |     |     | 59.1 56 48.5 52.6 80 |      |      |      |      |
| Donor         |     | mean M1-4, F2 |      |      |      |      | mean M5,6, F1,3-5 |      |      |      |      |     |     |     |     |     |                      |      |      |      |      |
| CpG           | nt  | #1            | #2   | #3   | #4   | #5   | #1                | #2   | #3   | #4   | #5   |     |     |     |     |     |                      |      |      |      |      |
| 1             | 1   | 27.5          | 37   | 18   | 34   | 67   | 64.2              | 67.5 | 65.8 | 67.5 | 83.3 |     |     |     |     |     |                      |      |      |      |      |
| 2             | 28  | 20            | 29   | 9    | 24   | 63   | 25.8              | 13.3 | 10.8 | 7.5  | 70   |     |     |     |     |     |                      |      |      |      |      |
| 3             | 57  | 42.5          | 33   | 14   | 38   | 72   | 67.5              | 63.3 | 71.7 | 66.7 | 80.8 |     |     |     |     |     |                      |      |      |      |      |
| 4             | 60  | 42.5          | 40   | 13   | 38   | 76   | 68.3              | 65   | 70.8 | 64.2 | 82.5 |     |     |     |     |     |                      |      |      |      |      |
| 5             | 89  | 45            | 43   | 17   | 43   | 86   | 68.3              | 66.7 | 71.7 | 65   | 90   |     |     |     |     |     |                      |      |      |      |      |
| 6             | 152 | 35            | 27   | 9    | 33   | 69   | 68.3              | 64.2 | 70.8 | 64.2 | 75   |     |     |     |     |     |                      |      |      |      |      |
| 7             | 158 | 42.5          | 45   | 16   | 35   | 82   | 68.3              | 69.2 | 75.8 | 65   | 89.2 |     |     |     |     |     |                      |      |      |      |      |
| 8             | 162 | 47.5          | 36   | 15   | 41   | 78   | 72.5              | 68.3 | 71.7 | 65.8 | 85   |     |     |     |     |     |                      |      |      |      |      |
| 9             | 237 | 55            | 67   | 51   | 67   | 81   | 70                | 74.2 | 77.5 | 69.2 | 86.7 |     |     |     |     |     |                      |      |      |      |      |
| 10            | 294 | 47.5          | 66   | 45   | 54   | 76   | 65                | 63.3 | 62.5 | 60   | 80   |     |     |     |     |     |                      |      |      |      |      |
| 11            | 317 | 45            | 71   | 41   | 60   | 81   | 33.3              | 22.5 | 16.7 | 11.7 | 74.2 |     |     |     |     |     |                      |      |      |      |      |
| 12            | 352 | 62.5          | 82   | 65   | 69   | 84   | 80.8              | 75   | 86.7 | 70   | 90   |     |     |     |     |     |                      |      |      |      |      |
| 13            | 354 | 65            | 83   | 69   | 73   | 88   | 79.2              | 74.2 | 85.8 | 70.8 | 85   |     |     |     |     |     |                      |      |      |      |      |
| mean CpGs 1-8 |     | 37.8          | 36.2 | 13.9 | 35.8 | 74.1 | 62.9              | 59.7 | 63.6 | 58.2 | 82   |     |     |     |     |     |                      |      |      |      |      |
| mean all CpGs |     | 44.4          | 50.7 | 29.4 | 46.8 | 77.2 | 64                | 60.5 | 64.5 | 57.5 | 82.4 |     |     |     |     |     |                      |      |      |      |      |

FUT7

| Donor |     | M1  |     |     |     |     | M2  |     |    |     |     | M3  |     |     |     |     | M4  |     |     |     |     | M5                    |      |      |      |      |      |      |      |      |      |
|-------|-----|-----|-----|-----|-----|-----|-----|-----|----|-----|-----|-----|-----|-----|-----|-----|-----|-----|-----|-----|-----|-----------------------|------|------|------|------|------|------|------|------|------|
| CpG   | nt  | #1  | #2  | #3  | #4  | #5  | #1  | #2  | #3 | #4  | #5  | #1  | #2  | #3  | #4  | #5  | #1  | #2  | #3  | #4  | #5  | #1                    | #2   | #3   | #4   | #5   |      |      |      |      |      |
| 1     | 1   | N/A | 90  | 35  | 45  | 75  | N/A | 65  | 55 | 90  | 70  | N/A | 75  | 75  | 60  | 45  | 70  | 55  | N/A | 90  | 80  | 35                    | 100  | 90   | 90   | 85   |      |      |      |      |      |
| 2     | 65  | N/A | 100 | 80  | 55  | 90  | N/A | 85  | 90 | 90  | 95  | N/A | 75  | 100 | 80  | 80  | 90  | 85  | N/A | 100 | 100 | 80                    | 100  | 100  | 90   | 100  |      |      |      |      |      |
| 3     | 95  | N/A | 100 | 95  | 70  | 80  | N/A | 95  | 85 | 100 | 90  | N/A | 90  | 95  | 70  | 75  | 100 | 85  | N/A | 100 | 100 | 85                    | 95   | 100  | 90   | 100  |      |      |      |      |      |
| 4     | 167 | N/A | 100 | 85  | 45  | 65  | N/A | 75  | 70 | 90  | 95  | N/A | 95  | 90  | 70  | 80  | 70  | 85  | N/A | 100 | 90  | 55                    | 100  | 100  | 90   | 95   |      |      |      |      |      |
| 5     | 250 | N/A | 75  | 45  | 10  | 45  | N/A | 50  | 10 | 0   | 50  | N/A | 60  | 40  | 25  | 50  | 30  | 20  | N/A | 20  | 70  | 5                     | 5    | 0    | 0    | 65   |      |      |      |      |      |
| 6     | 266 | N/A | 90  | 80  | 20  | 90  | N/A | 70  | 80 | 95  | 95  | N/A | 90  | 85  | 70  | 90  | 80  | 60  | N/A | 100 | 90  | 55                    | 95   | 80   | 90   | 95   |      |      |      |      |      |
| 7     | 288 | N/A | 75  | 40  | 15  | 60  | N/A | 70  | 45 | 75  | 70  | N/A | 70  | 70  | 65  | 60  | 75  | 50  | N/A | 80  | 85  | 55                    | 85   | 70   | 90   | 90   |      |      |      |      |      |
| 8     | 306 | N/A | 90  | 30  | 10  | 55  | N/A | 70  | 15 | 10  | 70  | N/A | 75  | 40  | 25  | 50  | 25  | 15  | N/A | 20  | 80  | 15                    | 5    | 0    | 20   | 50   |      |      |      |      |      |
| 9     | 387 | N/A | 65  | 50  | 20  | 30  | N/A | 60  | 20 | 10  | 60  | N/A | 50  | 15  | 5   | 45  | 0   | 15  | 35  | 10  | 50  | 0                     | 10   | 5    | 30   | 20   |      |      |      |      |      |
| 10    | 419 | N/A | 70  | 40  | 10  | 30  | N/A | 75  | 10 | 0   | 70  | N/A | 60  | 10  | 10  | 55  | 0   | 20  | 25  | 10  | 60  | 10                    | 90   | 100  | 70   | 55   |      |      |      |      |      |
| 11    | 480 | N/A | 100 | 95  | 55  | 80  | N/A | 95  | 75 | 80  | 90  | N/A | 100 | 50  | 35  | 100 | 0   | 30  | 25  | 30  | 85  | 45                    | 90   | 90   | 70   | 30   |      |      |      |      |      |
| 12    | 524 | N/A | 100 | 85  | 60  | 80  | N/A | 100 | 85 | 90  | 95  | N/A | 90  | 75  | 20  | 95  | 65  | 25  | 70  | 30  | 95  | 70                    | 20   | 5    | 5    | 10   |      |      |      |      |      |
| 13    | 543 | N/A | 100 | 95  | 45  | 85  | N/A | 100 | 80 | 85  | 95  | N/A | 95  | 40  | 20  | 100 | 60  | 25  | 65  | 35  | 100 | 80                    | 100  | 20   | 95   | 95   |      |      |      |      |      |
| 14    | 549 | N/A | 95  | 90  | 35  | 80  | N/A | 100 | 90 | 80  | 95  | N/A | 100 | 70  | 30  | 100 | 45  | 25  | 35  | 45  | 95  | 45                    | 95   | 20   | 55   | 40   |      |      |      |      |      |
| 15    | 642 | N/A | 100 | 90  | 60  | 95  | N/A | 100 | 80 | 100 | 100 | N/A | 100 | 75  | 25  | 100 | 45  | 20  | 60  | 25  | 85  | 50                    | 35   | 15   | 10   | 10   |      |      |      |      |      |
| 16    | 667 | N/A | 100 | 80  | 60  | 80  | N/A | 100 | 60 | 95  | 90  | N/A | 100 | 55  | 30  | 75  | 45  | 15  | 50  | 25  | 90  | 45                    | 95   | 100  | 60   | 50   |      |      |      |      |      |
| 17    | 707 | N/A | 95  | 100 | 80  | 85  | N/A | 100 | 80 | 95  | 95  | N/A | 100 | 60  | 30  | 70  | 25  | 10  | 50  | 55  | 95  | 40                    | 95   | 100  | 90   | 70   |      |      |      |      |      |
| 18    | 729 | N/A | 85  | 95  | 85  | 85  | N/A | 65  | 75 | 85  | 65  | N/A | 80  | 55  | 10  | 95  | 25  | 10  | 45  | 45  | 80  | 35                    | 100  | 100  | 100  | 100  |      |      |      |      |      |
| 19    | 731 | N/A | 100 | 100 | 100 | 90  | N/A | 100 | 90 | 100 | 100 | N/A | 75  | 35  | 10  | 95  | 50  | 10  | 60  | 60  | 95  | 45                    | 100  | 100  | 100  | 100  |      |      |      |      |      |
| Donor |     | M6  |     |     |     |     | F1  |     |    |     |     | F2  |     |     |     |     | F3  |     |     |     |     | mean all donors       |      |      |      |      |      |      |      |      |      |
| CpG   | nt  | #1  | #2  | #3  | #4  | #5  | #1  | #2  | #3 | #4  | #5  | #1  | #2  | #3  | #4  | #5  | #1  | #2  | #3  | #4  | #5  | #1                    | #2   | #3   | #4   | #5   |      |      |      |      |      |
| 1     | 1   | N/A | N/A | N/A | N/A | N/A | N/A | N/A | 30 | N/A | 80  | 95  | 100 | 100 | 95  | 100 | 95  | 100 | 85  | 100 | 95  | 73.8                  | 83.6 | 67.1 | 81.4 | 78.8 |      |      |      |      |      |
| 2     | 65  | N/A | N/A | N/A | N/A | N/A | N/A | N/A | 30 | N/A | 95  | 95  | 100 | 100 | 100 | 100 | 100 | 100 | 95  | 100 | 100 | 91.3                  | 92.1 | 85   | 87.9 | 95   |      |      |      |      |      |
| 3     | 95  | N/A | N/A | N/A | N/A | N/A | N/A | N/A | 30 | N/A | 85  | 90  | 100 | 100 | 100 | 100 | 100 | 100 | 95  | 100 | 100 | 93.8                  | 95   | 85.8 | 90   | 91.3 |      |      |      |      |      |
| 4     | 167 | N/A | N/A | N/A | N/A | N/A | N/A | N/A | 30 | N/A | 90  | 90  | 100 | 100 | 95  | 100 | 100 | 100 | 85  | 100 | 95  | 78.8                  | 93.6 | 80   | 84.3 | 88.8 |      |      |      |      |      |
| 5     | 250 | N/A | N/A | N/A | N/A | N/A | N/A | N/A | 0  | N/A | 10  | 0   | 0   | 15  | 25  | 5   | 20  | 0   | 15  | 10  | 55  | 13.8                  | 30   | 17.9 | 12.9 | 43.8 |      |      |      |      |      |
| 6     | 266 | N/A | N/A | N/A | N/A | N/A | N/A | N/A | 30 | N/A | 90  | 90  | 100 | 100 | 100 | 100 | 95  | 100 | 95  | 100 | 100 | 80                    | 86.4 | 78.6 | 82.1 | 93.8 |      |      |      |      |      |
| 7     | 288 | N/A | N/A | N/A | N/A | N/A | N/A | N/A | 30 | N/A | 70  | 90  | 100 | 10  | 80  | 90  | 75  | 100 | 80  | 90  | 80  | 73.8                  | 78.6 | 49.3 | 70.7 | 75.6 |      |      |      |      |      |
| 8     | 306 | N/A | N/A | N/A | N/A | N/A | N/A | N/A | 10 | N/A | 15  | 5   | 10  | 15  | 20  | 10  | 65  | 0   | 15  | 10  | 60  | 27.5                  | 37.9 | 17.9 | 16.4 | 48.8 |      |      |      |      |      |
| 9     | 387 | 20  | 25  | 20  | 10  | 30  | 5   | 90  | 0  | 0   | 30  | 50  | 35  | 45  | 55  | 60  | 55  | 60  | 25  | 5   | 10  | 21.7                  | 45.6 | 23.9 | 16.1 | 37.2 |      |      |      |      |      |
| 10    | 419 | 30  | 35  | 45  | 15  | 70  | 5   | 100 | 0  | 45  | 55  | 55  | 25  | 70  | 70  | 65  | 75  | 90  | 45  | 30  | 80  | 29.2                  | 62.8 | 38.3 | 28.9 | 60   |      |      |      |      |      |
| 11    | 480 | 20  | 40  | 60  | 20  | 95  | 5   | 100 | 0  | 0   | 65  | 45  | 55  | 80  | 60  | 60  | 45  | 75  | 45  | 25  | 95  | 26.7                  | 76.1 | 57.8 | 41.7 | 77.8 |      |      |      |      |      |
| 12    | 524 | 10  | 45  | 55  | 10  | 85  | 0   | 100 | 25 | 90  | 90  | 60  | 85  | 90  | 80  | 85  | 65  | 85  | 45  | 55  | 90  | 45                    | 72.2 | 59.4 | 48.9 | 80.6 |      |      |      |      |      |
| 13    | 543 | 60  | 60  | 60  | 35  | 100 | 10  | 100 | 25 | 100 | 85  | 80  | 85  | 90  | 95  | 85  | 90  | 100 | 80  | 70  | 95  | 63.3                  | 85   | 61.7 | 64.4 | 92.8 |      |      |      |      |      |
| 14    | 549 | 15  | 45  | 60  | 20  | 100 | 0   | 100 | 30 | 100 | 80  | 70  | 85  | 90  | 65  | 85  | 65  | 65  | 40  | 55  | 100 | 40                    | 78.9 | 58.3 | 53.9 | 86.1 |      |      |      |      |      |
| 15    | 642 | 25  | 40  | 50  | 25  | 90  | 0   | 100 | 30 | 100 | 85  | 60  | 90  | 80  | 85  | 80  | 60  | 80  | 50  | 35  | 90  | 40                    | 73.9 | 58.9 | 51.7 | 81.7 |      |      |      |      |      |
| 16    | 667 | 35  | 30  | 75  | 20  | 100 | 0   | 100 | 20 | 45  | 75  | 55  | 60  | 80  | 75  | 70  | 65  | 85  | 60  | 80  | 90  | 40.8                  | 76.1 | 64.4 | 54.4 | 80   |      |      |      |      |      |
| 17    | 707 | 35  | 35  | 70  | 25  | 95  | 0   | 100 | 5  | 100 | 90  | 60  | 80  | 60  | 60  | 70  | 65  | 80  | 75  | 95  | 95  | 37.5                  | 77.2 | 66.7 | 70   | 85   |      |      |      |      |      |
| 18    | 729 | 55  | 55  | 65  | 40  | 90  | 0   | 100 | 5  | 100 | 80  | 40  | 50  | 75  | 50  | 25  | 50  | 80  | 90  | 40  | 85  | 34.2                  | 69.4 | 67.2 | 61.7 | 78.3 |      |      |      |      |      |
| 19    | 731 | 50  | 60  | 70  | 40  | 90  | 0   | 100 | 20 | 100 | 85  | 65  | 80  | 95  | 90  | 75  | 85  | 100 | 100 | 95  | 90  | 49.2                  | 80.6 | 74.4 | 77.2 | 91.1 |      |      |      |      |      |
|       |     |     |     |     |     |     |     |     |    |     |     |     |     |     |     |     |     |     |     |     |     | mean CpGs 10-12,14,15 |      |      |      |      | 38.2 | 72.8 | 54.5 | 45   | 77.2 |
|       |     |     |     |     |     |     |     |     |    |     |     |     |     |     |     |     |     |     |     |     |     | mean CpGs 8-19        |      |      |      |      | 37.9 | 69.6 | 54.1 | 48.8 | 75   |

Foxp3 Enhancer

| Donor |     | M1  |    |    |     | M2  |     |     |     | M3  |     |     |     | M4  |     |     |     |     |
|-------|-----|-----|----|----|-----|-----|-----|-----|-----|-----|-----|-----|-----|-----|-----|-----|-----|-----|
| CpG   | nt  | #2  | #3 | #4 | #5  | #2  | #3  | #4  | #5  | #2  | #3  | #4  | #5  | #1  | #2  | #3  | #4  | #5  |
| 1     | 1   | 100 | 95 | 75 | 95  | 100 | 100 | 100 | 95  | 100 | 100 | 100 | 100 | 100 | 95  | 85  | 85  | 85  |
| 2     | 8   | 100 | 80 | 80 | 100 | 100 | 100 | 100 | 100 | 100 | 100 | 100 | 100 | 0   | 100 | 100 | 100 | 95  |
| 3     | 14  | 65  | 65 | 70 | 85  | 90  | 80  | 100 | 80  | 95  | 100 | 90  | 95  | 100 | 95  | 100 | 95  | 95  |
| 4     | 19  | 95  | 90 | 25 | 95  | 75  | 25  | 0   | 85  | 5   | 5   | 10  | 45  | 20  | 35  | 25  | 20  | 85  |
| 5     | 21  | 80  | 60 | 80 | 100 | 100 | 95  | 100 | 95  | 100 | 100 | 100 | 100 | 100 | 100 | 100 | 100 | 95  |
| 6     | 29  | 75  | 70 | 90 | 100 | 100 | 100 | 100 | 100 | 100 | 100 | 90  | 100 | 100 | 100 | 100 | 100 | 95  |
| 7     | 33  | 70  | 90 | 70 | 95  | 100 | 90  | 100 | 95  | 95  | 100 | 100 | 95  | 100 | 100 | 100 | 100 | 90  |
| 8     | 35  | 100 | 70 | 80 | 95  | 100 | 100 | 100 | 100 | 100 | 100 | 100 | 100 | 100 | 100 | 100 | 100 | 100 |
| 9     | 67  | 95  | 95 | 25 | 100 | 70  | 25  | 0   | 100 | 10  | 5   | 10  | 55  | 0   | 35  | 25  | 35  | 85  |
| 10    | 71  | 95  | 95 | 90 | 100 | 100 | 90  | 100 | 100 | 100 | 95  | 100 | 95  | 100 | 100 | 100 | 100 | 95  |
| 11    | 76  | 85  | 90 | 25 | 100 | 75  | 60  | 0   | 95  | 10  | 10  | 0   | 55  | 0   | 35  | 25  | 35  | 80  |
| 12    | 80  | 90  | 85 | 40 | 80  | 0   | 10  | 0   | 20  | 65  | 20  | 15  | 35  | 0   | 95  | 95  | 95  | 95  |
| 13    | 83  | 85  | 75 | 75 | 100 | 40  | 35  | 55  | 95  | 60  | 55  | 60  | 75  | 70  | 95  | 95  | 100 | 80  |
| 14    | 86  | 75  | 55 | 80 | 95  | 100 | 75  | 100 | 100 | 95  | 100 | 90  | 100 | 100 | 95  | 100 | 100 | 100 |
| 15    | 89  | 100 | 90 | 80 | 95  | 100 | 5   | 100 | 100 | 95  | 100 | 100 | 95  | 100 | 95  | 100 | 100 | 95  |
| 16    | 93  | 100 | 85 | 80 | 100 | 90  | 100 | 100 | 100 | 100 | 100 | 95  | 95  | 100 | 95  | 100 | 100 | 100 |
| 17    | 101 | 100 | 90 | 80 | 95  | 100 | 100 | 100 | 100 | 100 | 100 | 95  | 100 | 100 | 95  | 100 | 100 | 100 |
| 18    | 113 | 75  | 50 | 90 | 90  | 80  | 85  | 100 | 80  | 100 | 100 | 90  | 85  | 100 | 95  | 100 | 100 | 80  |
| 19    | 125 | 70  | 60 | 70 | 90  | 90  | 75  | 100 | 90  | 95  | 100 | 90  | 90  | 100 | 95  | 100 | 100 | 95  |
| 20    | 132 | 55  | 75 | 15 | 80  | 70  | 5   | 0   | 75  | 0   | 0   | 0   | 30  | 25  | 35  | 40  | 40  | 75  |
| 21    | 168 | 45  | 60 | 80 | 75  | 100 | 80  | 95  | 75  | 100 | 100 | 100 | 80  | 80  | 100 | 100 | 95  | 100 |
| 22    | 180 | 20  | 40 | 0  | 30  | 10  | 0   | 0   | 60  | 0   | 0   | 0   | 30  | 0   | 30  | 20  | 35  | 50  |
| 23    | 183 | 50  | 75 | 65 | 65  | 100 | 85  | 95  | 100 | 100 | 100 | 90  | 85  | 100 | 30  | 80  | 85  | 55  |
| 24    | 190 | 55  | 40 | 0  | 65  | 45  | 5   | 0   | 75  | 0   | 0   | 0   | 40  | 20  | 30  | 20  | 35  | 55  |
| 25    | 192 | 20  | 25 | 0  | 25  | 40  | 10  | 0   | 35  | 0   | 0   | 0   | 40  | 20  | 30  | 20  | 35  | 50  |
| 26    | 197 | 20  | 15 | 0  | 25  | 45  | 0   | 0   | 50  | 0   | 0   | 0   | 25  | 10  | 30  | 10  | 20  | 50  |
| 27    | 202 | 55  | 40 | 0  | 60  | 35  | 15  | 0   | 60  | 0   | 0   | 0   | 35  | 20  | 30  | 20  | 35  | 50  |
| 28    | 204 | 45  | 35 | 0  | 60  | 65  | 10  | 0   | 50  | 0   | 0   | 0   | 30  | 20  | 30  | 20  | 40  | 55  |
| 29    | 215 | 25  | 5  | 10 | 35  | 5   | 5   | 0   | 35  | 0   | 5   | 0   | 10  | 25  | 0   | 10  | 25  | 50  |
| 30    | 233 | 0   | 45 | 0  | 0   | 0   | 0   | 0   | 0   | 0   | 0   | 5   | 5   | 0   | 0   | 0   | 0   | 0   |
| 31    | 236 | 0   | 0  | 0  | 0   | 20  | 0   | 0   | 5   | 0   | 0   | 5   | 0   | 0   | 5   | 0   | 0   | 5   |
| 32    | 247 | 5   | 5  | 0  | 0   | 40  | 0   | 0   | 20  | 5   | 0   | 0   | 15  | 0   | 0   | 5   | 15  | 55  |
| 33    | 251 | 5   | 0  | 0  | 0   | 0   | 0   | 0   | 5   | 0   | 0   | 0   | 0   | 0   | 10  | 0   | 0   | 0   |
| 34    | 258 | 45  | 35 | 0  | 60  | 65  | 5   | 0   | 50  | 0   | 5   | 10  | 35  | 0   | 5   | 10  | 20  | 40  |
| 35    | 266 | 15  | 0  | 0  | 15  | 10  | 0   | 0   | 20  | 0   | 5   | 10  | 25  | 0   | 10  | 10  | 15  | 25  |
| 36    | 274 | 0   | 35 | 5  | 30  | 20  | 0   | 0   | 40  | 0   | 0   | 0   | 25  | 0   | 10  | 15  | 15  | 25  |
| 37    | 284 | 15  | 0  | 0  | 15  | 5   | 0   | 0   | 20  | 0   | 0   | 10  | 0   | 0   | 50  | 60  | 50  | 30  |
| 38    | 286 | 20  | 5  | 0  | 30  | 0   | 10  | 5   | 20  | 0   | 0   | 0   | 0   | 0   | 0   | 0   | 0   | 20  |
| 39    | 296 | 5   | 0  | 0  | 15  | 5   | 0   | 0   | 25  | 0   | 0   | 0   | 0   | 0   | 0   | 5   | 0   | 20  |
| 40    | 298 | 20  | 0  | 0  | 5   | 5   | 0   | 0   | 25  | 0   | 0   | 0   | 10  | 0   | 5   | 15  | 15  | 30  |
| 41    | 306 | 20  | 0  | 0  | 20  | 0   | 5   | 0   | 20  | 0   | 0   | 0   | 10  | 0   | 65  | 70  | 35  | 45  |
| 42    | 309 | 20  | 5  | 0  | 0   | 0   | 0   | 0   | 15  | 0   | 0   | 0   | 5   | 0   | 5   | 5   | 0   | 15  |

Foxp3 Enhancer

| Donor               |     | F1         |     |     |     |     | F2  |     |     |     |     | mean all donors |      |      |      |      |
|---------------------|-----|------------|-----|-----|-----|-----|-----|-----|-----|-----|-----|-----------------|------|------|------|------|
| CpG                 | nt  | #1         | #2  | #3  | #4  | #5  | #1  | #2  | #3  | #4  | #5  | #1              | #2   | #3   | #4   | #5   |
| 1                   | 1   | 95         | 90  | 85  | 90  | 95  | 90  | 90  | 95  | 80  | 80  | 95              | 96.3 | 93.3 | 88.3 | 91.7 |
| 2                   | 8   | 100        | 100 | 95  | 90  | 95  | 100 | 100 | 95  | 80  | 80  | 66.8            | 100  | 95   | 91.7 | 95   |
| 3                   | 14  | 100        | 100 | 95  | 90  | 90  | 100 | 100 | 100 | 100 | 100 | 100             | 90.9 | 90   | 90.9 | 90.9 |
| 4                   | 19  | 35         | 20  | 30  | 55  | 55  | 25  | 0   | 35  | 40  | 35  | 26.8            | 38.3 | 35   | 25   | 66.7 |
| 5                   | 21  | 100        | 100 | 95  | 90  | 100 | 100 | 100 | 100 | 100 | 100 | 100             | 96.7 | 91.7 | 95   | 98.3 |
| 6                   | 29  | 100        | 100 | 100 | 100 | 95  | 100 | 100 | 100 | 100 | 100 | 100             | 95.9 | 95   | 96.7 | 98.3 |
| 7                   | 33  | 100        | 100 | 95  | 90  | 100 | 100 | 100 | 100 | 100 | 100 | 100             | 94.1 | 95.9 | 93.3 | 95.9 |
| 8                   | 35  | 100        | 100 | 100 | 100 | 95  | 100 | 100 | 100 | 100 | 100 | 100             | 100  | 95   | 96.7 | 98.3 |
| 9                   | 67  | 35         | 20  | 25  | 55  | 55  | 35  | 5   | 35  | 60  | 80  | 23.3            | 39.1 | 35   | 30.9 | 79.1 |
| 10                  | 71  | 100        | 100 | 100 | 100 | 100 | 100 | 100 | 100 | 100 | 100 | 100             | 99.1 | 96.7 | 98.3 | 98.3 |
| 11                  | 76  | 45         | 20  | 25  | 55  | 60  | 35  | 5   | 35  | 60  | 80  | 26.8            | 38.3 | 40.9 | 29.1 | 78.3 |
| 12                  | 80  | 5          | 15  | 0   | 5   | 0   | 100 | 100 | 95  | 95  | 100 | 35              | 60.9 | 50.9 | 41.7 | 55   |
| 13                  | 83  | 70         | 60  | 65  | 5   | 85  | 100 | 100 | 90  | 95  | 100 | 80              | 73.3 | 69.1 | 65   | 89.1 |
| 14                  | 86  | 100        | 100 | 100 | 100 | 100 | 100 | 100 | 95  | 100 | 100 | 100             | 94.1 | 87.4 | 95   | 99.1 |
| 15                  | 89  | 100        | 100 | 100 | 100 | 100 | 100 | 100 | 95  | 80  | 80  | 100             | 98.3 | 81.7 | 93.3 | 94.1 |
| 16                  | 93  | 100        | 95  | 100 | 100 | 95  | 100 | 100 | 95  | 100 | 100 | 100             | 96.7 | 96.7 | 95.9 | 98.3 |
| 17                  | 101 | 100        | 100 | 100 | 100 | 95  | 100 | 100 | 100 | 100 | 100 | 100             | 99.1 | 98.3 | 95.9 | 98.3 |
| 18                  | 113 | 100        | 100 | 100 | 0   | 90  | 100 | 100 | 100 | 100 | 100 | 100             | 91.7 | 89.1 | 80   | 85.4 |
| 19                  | 125 | 100        | 100 | 100 | 0   | 95  | 100 | 100 | 95  | 100 | 100 | 100             | 91.7 | 88.3 | 76.7 | 93.3 |
| 20                  | 132 | 45         | 20  | 25  | 55  | 60  | 30  | 5   | 40  | 65  | 75  | 33.3            | 30.9 | 30.9 | 29.1 | 65.9 |
| 21                  | 168 | 100        | 15  | 100 | 0   | 85  | 90  | 100 | 95  | 100 | 90  | 90              | 76.7 | 89.1 | 78.3 | 84.1 |
| 22                  | 180 | 30         | 20  | 20  | 45  | 45  | 15  | 0   | 45  | 35  | 15  | 15              | 13.3 | 20.9 | 19.1 | 38.3 |
| 23                  | 183 | 30         | 85  | 100 | 65  | 70  | 100 | 100 | 75  | 75  | 100 | 76.8            | 77.4 | 85.9 | 79.1 | 79.1 |
| 24                  | 190 | 45         | 20  | 20  | 45  | 55  | 15  | 0   | 45  | 35  | 35  | 26.8            | 25   | 21.7 | 19.1 | 54.1 |
| 25                  | 192 | 40         | 20  | 20  | 45  | 45  | 15  | 0   | 45  | 35  | 35  | 25              | 18.3 | 20   | 19.1 | 38.3 |
| 26                  | 197 | 20         | 5   | 20  | 10  | 35  | 15  | 0   | 0   | 10  | 20  | 15              | 16.7 | 7.4  | 6.7  | 34.1 |
| 27                  | 202 | 45         | 20  | 20  | 50  | 45  | 15  | 0   | 45  | 25  | 15  | 26.8            | 23.3 | 23.3 | 18.3 | 44.1 |
| 28                  | 204 | 45         | 20  | 20  | 50  | 45  | 15  | 0   | 45  | 25  | 15  | 26.8            | 26.7 | 21.6 | 19.1 | 42.4 |
| 29                  | 215 | 15         | 10  | 20  | 10  | 35  | 15  | 0   | 10  | 10  | 35  | 18.3            | 6.7  | 9.1  | 9.1  | 33.3 |
| 30                  | 233 | 0          | 5   | 0   | 10  | 25  | 0   | 0   | 0   | 0   | 0   | 0               | 0.7  | 7.4  | 2.4  | 5    |
| 31                  | 236 | 0          | 5   | 0   | 10  | 25  | 0   | 0   | 0   | 0   | 0   | 0               | 5    | 0    | 2.4  | 5.9  |
| 32                  | 247 | 30         | 15  | 0   | 45  | 35  | 10  | 0   | 45  | 45  | 30  | 13.3            | 10.9 | 9.1  | 17.4 | 26.3 |
| 33                  | 251 | 0          | 5   | 0   | 5   | 15  | 0   | 5   | 0   | 0   | 0   | 0               | 4.1  | 0    | 0.7  | 3.3  |
| 34                  | 258 | 40         | 5   | 0   | 45  | 45  | 10  | 0   | 35  | 45  | 40  | 16.8            | 20   | 15   | 20   | 45   |
| 35                  | 266 | 30         | 20  | 0   | 45  | 35  | 10  | 0   | 40  | 45  | 30  | 13.3            | 9.1  | 9.1  | 19.1 | 25   |
| 36                  | 274 | 30         | 20  | 0   | 45  | 30  | 10  | 0   | 50  | 45  | 40  | 13.3            | 8.3  | 16.7 | 18.3 | 31.7 |
| 37                  | 284 | 15         | 80  | 0   | 5   | 20  | 40  | 50  | 25  | 15  | 35  | 18.3            | 33.3 | 14.1 | 13.3 | 20   |
| 38                  | 286 | 15         | 10  | 0   | 5   | 25  | 10  | 0   | 20  | 10  | 35  | 8.3             | 5    | 5.9  | 3.3  | 21.7 |
| 39                  | 296 | 15         | 10  | 0   | 5   | 20  | 10  | 0   | 20  | 10  | 35  | 8.3             | 3.3  | 4.1  | 2.4  | 19.1 |
| 40                  | 298 | 45         | 20  | 0   | 45  | 30  | 0   | 0   | 40  | 35  | 10  | 15              | 8.3  | 9.1  | 15.9 | 18.3 |
| 41                  | 306 | 45         | 90  | 0   | 45  | 30  | 30  | 50  | 55  | 55  | 45  | 25              | 37.6 | 21.7 | 22.4 | 28.3 |
| 42                  | 309 | 15         | 0   | 0   | 5   | 15  | 10  | 0   | 10  | 10  | 50  | 8.3             | 4.1  | 3.3  | 2.4  | 16.7 |
| mean CpGs 4,9,11,20 |     | all donors |     |     |     |     |     |     |     |     |     | 27.6            | 36.7 | 35.5 | 28.5 | 72.5 |
| mean CpGs 4,9,11,20 |     | donor M4   |     |     |     |     |     |     |     |     |     | 11.2            | 35   | 28.7 | 32.5 | 81.2 |

Foxp3 preTSDR

| Donor                      |     | M2  |     |     |     |     | M4              |      |      |      |      | M5                     |     |    |    |     | M6                     |     |     |     |     |
|----------------------------|-----|-----|-----|-----|-----|-----|-----------------|------|------|------|------|------------------------|-----|----|----|-----|------------------------|-----|-----|-----|-----|
| CpG                        | nt  | #1  | #2  | #3  | #4  | #5  | #1              | #2   | #3   | #4   | #5   | #1                     | #2  | #3 | #4 | #5  | #1                     | #2  | #3  | #4  | #5  |
| 1                          | 1   | N/A | 90  | 75  | 90  | 85  | 45              | 100  | 10   | 0    | 75   | 85                     | 65  | 60 | 45 | 55  | 15                     | 35  | 85  | 60  | 75  |
| 2                          | 30  | N/A | 100 | 80  | 100 | 100 | 95              | 100  | 80   | 75   | 100  | 100                    | 95  | 85 | 90 | 90  | 100                    | 100 | 100 | 100 | 100 |
| 3                          | 37  | N/A | 100 | 80  | 100 | 100 | 95              | 100  | 90   | 75   | 100  | 100                    | 95  | 85 | 90 | 90  | 100                    | 100 | 100 | 100 | 95  |
| 4                          | 87  | N/A | 100 | 80  | 95  | 100 | 95              | 100  | 80   | 95   | 95   | 95                     | 95  | 80 | 90 | 90  | 100                    | 100 | 100 | 100 | 95  |
| 5                          | 123 | N/A | 40  | 15  | 10  | 10  | 30              | 100  | 15   | 0    | 70   | 20                     | 50  | 65 | 70 | 70  | 15                     | 20  | 0   | 65  | 85  |
| 6                          | 187 | N/A | 65  | 75  | 80  | 100 | 70              | 0    | 70   | 70   | 75   | 80                     | 90  | 75 | 85 | 80  | 85                     | 45  | 95  | 30  | 75  |
| 7                          | 243 | N/A | 95  | 75  | 90  | 85  | 30              | 100  | 10   | 0    | 65   | 85                     | 45  | 60 | 45 | 55  | 15                     | 30  | 90  | 70  | 85  |
| 8                          | 334 | N/A | 50  | 15  | 10  | 10  | 30              | 100  | 10   | 0    | 80   | 25                     | 75  | 80 | 80 | 75  | 15                     | 15  | 5   | 65  | 85  |
| 9                          | 357 | N/A | 10  | 10  | 0   | 10  | 5               | 0    | 0    | 0    | 60   | 0                      | 50  | 60 | 45 | 50  | 0                      | 15  | 0   | 0   | 60  |
| 10                         | 524 | N/A | 55  | 10  | 25  | 45  | 90              | 100  | 85   | 80   | 100  | 30                     | 90  | 85 | 90 | 95  | 100                    | 75  | 20  | 95  | 90  |
| Donor                      |     | F1  |     |     |     |     | F2              |      |      |      |      | F3                     |     |    |    |     | F4                     |     |     |     |     |
| CpG                        | nt  | #1  | #2  | #3  | #4  | #5  | #1              | #2   | #3   | #4   | #5   | #1                     | #2  | #3 | #4 | #5  | #1                     | #2  | #3  | #4  | #5  |
| 1                          | 1   | 10  | 70  | 25  | 0   | 75  | 10              | 75   | 30   | 100  | 90   | 55                     | 25  | 50 | 45 | 70  | 75                     | 80  | 65  | 75  | 60  |
| 2                          | 30  | 10  | 100 | 45  | 100 | 100 | 25              | 90   | 55   | 100  | 100  | 100                    | 25  | 55 | 80 | 100 | 95                     | 90  | 90  | 90  | 100 |
| 3                          | 37  | 20  | 100 | 45  | 100 | 100 | 25              | 90   | 65   | 100  | 100  | 100                    | 100 | 20 | 50 | 80  | 95                     | 90  | 95  | 90  | 100 |
| 4                          | 87  | 15  | 100 | 60  | 95  | 100 | 15              | 85   | 55   | 90   | 95   | 90                     | 30  | 55 | 80 | 90  | 100                    | 85  | 90  | 85  | 100 |
| 5                          | 123 | 0   | 95  | 10  | 0   | 10  | 0               | 35   | 25   | 10   | 20   | 60                     | 25  | 30 | 45 | 85  | 15                     | 20  | 15  | 30  | 70  |
| 6                          | 187 | 5   | 30  | 50  | 100 | 100 | 15              | 65   | 60   | 70   | 95   | 50                     | 40  | 60 | 35 | 90  | 100                    | 70  | 90  | 80  | 80  |
| 7                          | 243 | 10  | 90  | 35  | 95  | 75  | 15              | 90   | 45   | 100  | 85   | 60                     | 40  | 50 | 50 | 95  | 80                     | 90  | 75  | 75  | 80  |
| 8                          | 334 | 10  | 100 | 20  | 95  | 20  | 0               | 45   | 30   | 25   | 30   | 80                     | 50  | 40 | 50 | 100 | 35                     | 40  | 10  | 55  | 75  |
| 9                          | 357 | 0   | 25  | 95  | 5   | 20  | 0               | 30   | 15   | 0    | 35   | 15                     | 40  | 25 | 15 | 90  | 20                     | 10  | 5   | 20  | 55  |
| 10                         | 524 | 10  | 100 | 50  | 100 | 45  | 10              | 60   | 30   | 20   | 65   | 95                     | 35  | 60 | 75 | 100 | 60                     | 40  | 45  | 40  | 80  |
|                            |     |     |     |     |     |     | mean all donors |      |      |      |      | 70.5 33 47.5 55.5 91.5 |     |    |    |     | mean all CpGs donor F3 |     |     |     |     |
| CpG                        | nt  | #1  | #2  | #3  | #4  | #5  | #1              | #2   | #3   | #4   | #5   |                        |     |    |    |     |                        |     |     |     |     |
| 1                          | 1   | 70  | 40  | 95  | 55  | 100 | 45.6            | 64.4 | 55   | 52.2 | 76.1 |                        |     |    |    |     |                        |     |     |     |     |
| 2                          | 30  | 95  | 75  | 100 | 80  | 100 | 77.5            | 86.1 | 76.7 | 90.6 | 98.9 |                        |     |    |    |     |                        |     |     |     |     |
| 3                          | 37  | 95  | 75  | 95  | 80  | 100 | 78.8            | 85.6 | 78.3 | 90.6 | 97.8 |                        |     |    |    |     |                        |     |     |     |     |
| 4                          | 87  | 85  | 75  | 90  | 80  | 95  | 74.4            | 85.6 | 76.7 | 90   | 95.6 |                        |     |    |    |     |                        |     |     |     |     |
| 5                          | 123 | 30  | 45  | 35  | 20  | 15  | 21.3            | 47.8 | 23.3 | 27.8 | 48.3 |                        |     |    |    |     |                        |     |     |     |     |
| 6                          | 187 | 80  | 70  | 60  | 70  | 95  | 60.6            | 52.8 | 70.6 | 68.9 | 87.8 |                        |     |    |    |     |                        |     |     |     |     |
| 7                          | 243 | 80  | 75  | 100 | 70  | 90  | 46.9            | 72.8 | 60   | 66.1 | 79.4 |                        |     |    |    |     |                        |     |     |     |     |
| 8                          | 334 | 35  | 45  | 55  | 25  | 30  | 28.8            | 57.8 | 29.4 | 45   | 56.1 |                        |     |    |    |     |                        |     |     |     |     |
| 9                          | 357 | 30  | 40  | 15  | 20  | 20  | 8.8             | 24.4 | 25   | 11.7 | 44.4 |                        |     |    |    |     |                        |     |     |     |     |
| 10                         | 524 | 50  | 50  | 55  | 30  | 45  | 55.6            | 67.2 | 48.9 | 61.7 | 73.9 |                        |     |    |    |     |                        |     |     |     |     |
| mean CpGs 5,8,9 all donors |     |     |     |     |     |     | 19.6            | 43.3 | 25.9 | 28.2 | 49.6 |                        |     |    |    |     |                        |     |     |     |     |
| mean CpGs 5,8,9 donor M6   |     |     |     |     |     |     | 10              | 16.7 | 1.7  | 43.3 | 76.7 |                        |     |    |    |     |                        |     |     |     |     |

Foxp3 promoter

| Donor         |     | M1  |    |    |    |    | M2              |     |     |     |      | M3            |      |     |      |      | M4                 |     |     |     |     |
|---------------|-----|-----|----|----|----|----|-----------------|-----|-----|-----|------|---------------|------|-----|------|------|--------------------|-----|-----|-----|-----|
| CpG           | nt  | #1  | #2 | #3 | #4 | #5 | #1              | #2  | #3  | #4  | #5   | #1            | #2   | #3  | #4   | #5   | #1                 | #2  | #3  | #4  | #5  |
| 1             | 1   | N/A | 15 | 0  | 15 | 60 | N/A             | 0   | 0   | 0   | 30   | N/A           | 0    | 0   | 0    | 0    | 0                  | 0   | 0   | 0   | 0   |
| 2             | 41  | N/A | 15 | 0  | 5  | 45 | N/A             | 0   | 0   | 0   | 25   | N/A           | 0    | 0   | 0    | 0    | 0                  | 0   | 0   | 0   | 0   |
| 3             | 118 | N/A | 15 | 5  | 10 | 55 | N/A             | 0   | 0   | 0   | 25   | N/A           | 0    | 0   | 0    | 0    | 5                  | 0   | 0   | 5   | 0   |
| 4             | 130 | N/A | 15 | 0  | 10 | 75 | N/A             | 5   | 0   | 0   | 65   | N/A           | 0    | 0   | 0    | 5    | 0                  | 0   | 0   | 0   | 0   |
| 5             | 143 | N/A | 15 | 10 | 20 | 70 | N/A             | 5   | 0   | 0   | 70   | N/A           | 0    | 0   | 0    | 0    | 0                  | 0   | 0   | 0   | 0   |
| 6             | 179 | N/A | 10 | 10 | 20 | 85 | N/A             | 15  | 0   | 0   | 75   | N/A           | 0    | 0   | 5    | 15   | 5                  | 0   | 5   | 0   | 0   |
| 7             | 191 | N/A | 15 | 5  | 15 | 60 | N/A             | 15  | 0   | 0   | 70   | N/A           | 0    | 0   | 5    | 10   | 0                  | 0   | 0   | 0   | 0   |
| 8             | 198 | N/A | 10 | 0  | 25 | 75 | N/A             | 5   | 0   | 0   | 65   | N/A           | 0    | 0   | 0    | 15   | 0                  | 5   | 0   | 5   | 0   |
| 9             | 213 | N/A | 0  | 0  | 15 | 60 | N/A             | 5   | 0   | 0   | 25   | N/A           | 0    | 0   | 0    | 0    | 0                  | 0   | 0   | 0   | 0   |
| 10            | 241 | N/A | 5  | 15 | 70 | 70 | N/A             | 5   | 0   | 0   | 55   | N/A           | 0    | 0   | 0    | 20   | 0                  | 0   | 0   | 0   | 0   |
| Donor         |     | M5  |    |    |    |    | M6              |     |     |     |      | F1            |      |     |      |      | F2                 |     |     |     |     |
| CpG           | nt  | #1  | #2 | #3 | #4 | #5 | #1              | #2  | #3  | #4  | #5   | #1            | #2   | #3  | #4   | #5   | #1                 | #2  | #3  | #4  | #5  |
| 1             | 1   | 0   | 0  | 0  | 0  | 0  | 0               | 0   | 0   | 0   | 0    | 0             | 0    | 0   | 0    | 30   | 0                  | 0   | 0   | 0   | 5   |
| 2             | 41  | 0   | 0  | 0  | 0  | 0  | 0               | 0   | 0   | 0   | 0    | 0             | 0    | 0   | 0    | 20   | 0                  | 0   | 0   | 0   | 0   |
| 3             | 118 | 0   | 0  | 0  | 0  | 0  | 0               | 0   | 0   | 0   | 0    | 0             | 0    | 0   | 0    | 20   | 5                  | 0   | 5   | 0   | 0   |
| 4             | 130 | 0   | 0  | 0  | 0  | 0  | 0               | 0   | 0   | 0   | 0    | 0             | 0    | 0   | 0    | 50   | 5                  | 0   | 0   | 0   | 0   |
| 5             | 143 | 0   | 0  | 0  | 0  | 0  | 0               | 0   | 0   | 0   | 0    | 0             | 0    | 0   | 0    | 40   | 5                  | 0   | 0   | 0   | 5   |
| 6             | 179 | 0   | 0  | 0  | 0  | 0  | 0               | 0   | 0   | 0   | 0    | 0             | 0    | 0   | 0    | 50   | 5                  | 0   | 0   | 0   | 0   |
| 7             | 191 | 0   | 0  | 0  | 0  | 0  | 0               | 0   | 0   | 0   | 0    | 0             | 0    | 0   | 0    | 50   | 0                  | 0   | 0   | 0   | 0   |
| 8             | 198 | 0   | 0  | 0  | 0  | 0  | 0               | 0   | 0   | 0   | 0    | 0             | 0    | 0   | 0    | 40   | 0                  | 0   | 0   | 0   | 0   |
| 9             | 213 | 0   | 0  | 0  | 0  | 0  | 0               | 0   | 0   | 0   | 0    | 0             | 0    | 0   | 0    | 45   | 0                  | 10  | 0   | 0   | 0   |
| 10            | 241 | 0   | 0  | 0  | 0  | 0  | 0               | 0   | 0   | 0   | 0    | 0             | 0    | 0   | 0    | 40   | 0                  | 0   | 0   | 0   | 0   |
| Donor         |     | F3  |    |    |    |    | mean all donors |     |     |     |      | mean M1 and 2 |      |     |      |      | mean M3-6 and F1-5 |     |     |     |     |
| CpG           | nt  | #1  | #2 | #3 | #4 | #5 | #1              | #2  | #3  | #4  | #5   | #1            | #2   | #3  | #4   | #5   | #1                 | #2  | #3  | #4  | #5  |
| 1             | 1   | 0   | 0  | 0  | 0  | 0  | 0               | 1.7 | 0   | 1.7 | 13.9 | N/A           | 7.5  | 0   | 7.5  | 45   | 0                  | 0   | 0   | 0   | 5   |
| 2             | 41  | 0   | 0  | 0  | 0  | 0  | 0               | 1.7 | 0   | 0.6 | 10   | N/A           | 7.5  | 0   | 2.5  | 35   | 0                  | 0   | 0   | 0   | 2.9 |
| 3             | 118 | 0   | 0  | 0  | 0  | 0  | 1.7             | 1.7 | 1.1 | 1.7 | 11.1 | N/A           | 7.5  | 2.5 | 5    | 40   | 1.7                | 0   | 0.7 | 0.7 | 2.9 |
| 4             | 130 | 0   | 0  | 0  | 0  | 0  | 0.8             | 2.2 | 0   | 1.1 | 21.7 | N/A           | 10   | 0   | 5    | 70   | 0.8                | 0   | 0   | 0   | 7.9 |
| 5             | 143 | 0   | 0  | 0  | 0  | 0  | 0.8             | 2.2 | 1.1 | 2.2 | 20.6 | N/A           | 10   | 5   | 10   | 70   | 0.8                | 0   | 0   | 0   | 6.4 |
| 6             | 179 | 0   | 0  | 0  | 0  | 0  | 1.7             | 2.8 | 1.7 | 2.8 | 25   | N/A           | 12.5 | 5   | 10   | 80   | 1.7                | 0   | 0.7 | 0.7 | 9.3 |
| 7             | 191 | 0   | 0  | 0  | 0  | 0  | 0               | 3.3 | 0.6 | 2.2 | 21.1 | N/A           | 15   | 2.5 | 7.5  | 65   | 0                  | 0   | 0   | 0.7 | 8.6 |
| 8             | 198 | 0   | 0  | 0  | 0  | 0  | 0               | 2.2 | 0   | 3.3 | 21.7 | N/A           | 7.5  | 0   | 12.5 | 70   | 0                  | 0.7 | 0   | 0.7 | 7.9 |
| 9             | 213 | 0   | 0  | 0  | 0  | 0  | 0               | 1.7 | 0   | 1.7 | 14.4 | N/A           | 2.5  | 0   | 7.5  | 42.5 | 0                  | 1.4 | 0   | 0   | 6.4 |
| 10            | 241 | 0   | 0  | 0  | 0  | 0  | 0               | 2.2 | 0.6 | 1.7 | 20.6 | N/A           | 10   | 2.5 | 7.5  | 62.5 | 0                  | 0   | 0   | 0   | 8.6 |
| mean all CpGs |     |     |    |    |    |    | 0.5             | 2.2 | 0.5 | 1.9 | 18   | N/A           | 9    | 1.7 | 7.5  | 58   | 0.5                | 0.2 | 0.1 | 0.3 | 6.6 |

| Foxp3 Promoter Top/Reverse Strands |     |    |     |    |    |     |    |     |    |
|------------------------------------|-----|----|-----|----|----|-----|----|-----|----|
| Donor                              |     | M6 |     |    | F3 |     | F4 |     |    |
| subset                             |     | #2 | #5  | #5 | #2 | #5  | #2 | #5  | #5 |
| CpG                                | nt  | TS | TS  | RS | TS | TS  | TS | TS  | RS |
| 1                                  | 1   | 0  | 60  | 0  | 60 | 80  | 60 | 40  | 0  |
| 2                                  | 41  | 0  | 50  | 0  | 70 | 40  | 0  | 40  | 0  |
| 3                                  | 118 | 0  | 60  | 0  | 90 | 50  | 60 | 30  | 0  |
| 4                                  | 130 | 10 | 100 | 0  | 80 | 70  | 60 | 80  | 0  |
| 5                                  | 143 | 10 | 100 | 0  | 80 | 90  | 60 | 90  | 0  |
| 6                                  | 179 | 10 | 100 | 0  | 0  | 50  | 0  | 0   | 0  |
| 7                                  | 191 | 0  | 90  | 0  | 80 | 100 | 60 | 100 | 0  |
| 8                                  | 198 | 10 | 100 | 0  | 80 | 70  | 60 | 100 | 0  |
| 9                                  | 213 | 0  | 90  | 0  | 50 | 100 | 60 | 80  | 0  |
| 10                                 | 241 | 10 | 90  | 0  | 40 | 70  | 60 | 80  | 0  |
| mean all CpGs                      |     | 5  | 84  | 0  | 63 | 72  | 48 | 64  | 0  |

Foxp3 TSDR

| Donor |     | M1             |      |     |      |      | M2             |      |      |      |      | M3              |     |     |     |     | M4              |      |      |      |      |
|-------|-----|----------------|------|-----|------|------|----------------|------|------|------|------|-----------------|-----|-----|-----|-----|-----------------|------|------|------|------|
| CpG   | nt  | #1             | #2   | #3  | #4   | #5   | #1             | #2   | #3   | #4   | #5   | #1              | #2  | #3  | #4  | #5  | #1              | #2   | #3   | #4   | #5   |
| 1     | 1   | N/A            | 25   | 0   | 10   | 95   | N/A            | 75   | 0    | 15   | 80   | N/A             | 85  | 100 | 100 | 100 | 100             | 70   | 90   | 100  | 100  |
| 2     | 6   | N/A            | 25   | 0   | 0    | 85   | N/A            | 70   | 0    | 15   | 80   | N/A             | 95  | 100 | 100 | 100 | 100             | 70   | 90   | 100  | 100  |
| 3     | 47  | N/A            | 30   | 0   | 10   | 95   | N/A            | 70   | 0    | 10   | 75   | N/A             | 85  | 95  | 100 | 100 | 100             | 70   | 90   | 100  | 100  |
| 4     | 55  | N/A            | 25   | 0   | 10   | 90   | N/A            | 65   | 0    | 15   | 70   | N/A             | 95  | 100 | 100 | 100 | 100             | 70   | 90   | 100  | 100  |
| 5     | 65  | N/A            | 25   | 0   | 10   | 95   | N/A            | 65   | 0    | 20   | 75   | N/A             | 85  | 100 | 95  | 100 | 100             | 70   | 90   | 100  | 100  |
| 6     | 68  | N/A            | 25   | 5   | 10   | 90   | N/A            | 70   | 0    | 15   | 80   | N/A             | 95  | 100 | 95  | 100 | 100             | 70   | 90   | 100  | 100  |
| 7     | 74  | N/A            | 25   | 0   | 10   | 95   | N/A            | 70   | 0    | 15   | 80   | N/A             | 95  | 100 | 100 | 100 | 100             | 70   | 90   | 100  | 100  |
| 8     | 78  | N/A            | 25   | 0   | 10   | 100  | N/A            | 70   | 0    | 15   | 80   | N/A             | 95  | 100 | 100 | 100 | 100             | 70   | 90   | 100  | 100  |
| 9     | 86  | N/A            | 25   | 0   | 10   | 95   | N/A            | 70   | 0    | 15   | 80   | N/A             | 85  | 100 | 100 | 100 | 100             | 65   | 90   | 100  | 100  |
| 10    | 95  | N/A            | 25   | 0   | 10   | 95   | N/A            | 70   | 0    | 15   | 80   | N/A             | 95  | 95  | 100 | 100 | 100             | 65   | 90   | 100  | 100  |
| 11    | 114 | N/A            | 25   | 0   | 10   | 95   | N/A            | 70   | 0    | 15   | 80   | N/A             | 95  | 100 | 100 | 100 | 100             | 65   | 90   | 100  | 100  |
| 12    | 149 | N/A            | 25   | 0   | 10   | 80   | N/A            | 75   | 0    | 15   | 75   | N/A             | 85  | 100 | 95  | 100 | 100             | 60   | 90   | 100  | 100  |
| 13    | 221 | N/A            | 25   | 0   | 10   | 65   | N/A            | 75   | 5    | 0    | 90   | N/A             | 90  | 100 | 100 | 100 | 100             | 60   | 90   | 100  | 100  |
| 14    | 246 | N/A            | 30   | 0   | 10   | 100  | N/A            | 80   | 5    | 10   | 90   | N/A             | 90  | 100 | 100 | 100 | 100             | 55   | 90   | 100  | 100  |
| 15    | 259 | N/A            | 25   | 0   | 15   | 90   | N/A            | 80   | 5    | 10   | 90   | N/A             | 90  | 95  | 100 | 100 | 100             | 55   | 90   | 100  | 100  |
| Donor |     | M5             |      |     |      |      | M6             |      |      |      |      | F1              |     |     |     |     | F2              |      |      |      |      |
| CpG   | nt  | #1             | #2   | #3  | #4   | #5   | #1             | #2   | #3   | #4   | #5   | #1              | #2  | #3  | #4  | #5  | #1              | #2   | #3   | #4   | #5   |
| 1     | 1   | 100            | 100  | 100 | 100  | 100  | 100            | 100  | 100  | 100  | 100  | 100             | 100 | 90  | 90  | 85  | 100             | 100  | 100  | 100  | 100  |
| 2     | 6   | 100            | 100  | 100 | 100  | 100  | 100            | 100  | 100  | 100  | 100  | 100             | 100 | 90  | 95  | 95  | 100             | 100  | 100  | 100  | 100  |
| 3     | 47  | 100            | 100  | 100 | 100  | 100  | 100            | 100  | 100  | 100  | 100  | 100             | 100 | 90  | 95  | 95  | 100             | 100  | 100  | 100  | 100  |
| 4     | 55  | 100            | 100  | 100 | 100  | 100  | 100            | 100  | 100  | 100  | 100  | 100             | 100 | 90  | 90  | 95  | 100             | 100  | 100  | 100  | 100  |
| 5     | 65  | 100            | 100  | 100 | 100  | 100  | 100            | 100  | 100  | 100  | 100  | 100             | 85  | 65  | 95  | 75  | 100             | 100  | 100  | 100  | 100  |
| 6     | 68  | 100            | 100  | 100 | 100  | 100  | 100            | 100  | 100  | 100  | 100  | 100             | 100 | 90  | 95  | 90  | 100             | 100  | 100  | 100  | 100  |
| 7     | 74  | 100            | 100  | 100 | 100  | 100  | 100            | 100  | 100  | 100  | 100  | 100             | 100 | 90  | 95  | 90  | 100             | 100  | 100  | 100  | 100  |
| 8     | 78  | 100            | 100  | 100 | 100  | 100  | 100            | 100  | 100  | 100  | 100  | 100             | 100 | 90  | 95  | 90  | 100             | 100  | 100  | 100  | 100  |
| 9     | 86  | 100            | 100  | 100 | 100  | 100  | 100            | 100  | 100  | 100  | 100  | 100             | 100 | 90  | 95  | 90  | 100             | 100  | 100  | 100  | 100  |
| 10    | 95  | 100            | 100  | 100 | 100  | 100  | 100            | 100  | 100  | 100  | 100  | 100             | 100 | 90  | 95  | 95  | 100             | 100  | 100  | 100  | 100  |
| 11    | 114 | 100            | 100  | 100 | 100  | 100  | 100            | 100  | 100  | 100  | 100  | 100             | 100 | 85  | 95  | 90  | 100             | 100  | 100  | 100  | 100  |
| 12    | 149 | 100            | 100  | 100 | 100  | 100  | 100            | 100  | 100  | 100  | 100  | 100             | 100 | 90  | 90  | 90  | 100             | 100  | 100  | 100  | 100  |
| 13    | 221 | 100            | 100  | 100 | 100  | 100  | 100            | 100  | 100  | 100  | 100  | 100             | 100 | 80  | 90  | 70  | 100             | 100  | 100  | 100  | 100  |
| 14    | 246 | 100            | 100  | 100 | 100  | 100  | 100            | 100  | 100  | 100  | 100  | 100             | 100 | 90  | 90  | 85  | 100             | 100  | 100  | 100  | 100  |
| 15    | 259 | 100            | 100  | 100 | 100  | 100  | 100            | 100  | 100  | 100  | 100  | 100             | 100 | 90  | 90  | 80  | 100             | 100  | 100  | 100  | 100  |
| Donor |     | F3             |      |     |      |      | F4             |      |      |      |      | F5              |     |     |     |     | mean all donors |      |      |      |      |
| CpG   | nt  | #1             | #2   | #3  | #4   | #5   | #1             | #2   | #3   | #4   | #5   | #1              | #2  | #3  | #4  | #5  | #1              | #2   | #3   | #4   | #5   |
| 1     | 1   | 100            | 100  | 100 | 100  | 100  | 100            | 100  | 100  | 100  | 100  | 100             | 100 | 100 | 100 | 100 | 100             | 86.8 | 80   | 83.2 | 96.4 |
| 2     | 6   | 100            | 100  | 100 | 100  | 100  | 100            | 100  | 100  | 100  | 100  | 100             | 100 | 100 | 100 | 100 | 100             | 87.3 | 80   | 82.7 | 96.4 |
| 3     | 47  | 100            | 100  | 100 | 100  | 100  | 100            | 100  | 100  | 100  | 100  | 100             | 100 | 100 | 100 | 100 | 100             | 86.8 | 79.5 | 83.2 | 96.8 |
| 4     | 55  | 100            | 100  | 100 | 100  | 100  | 100            | 100  | 100  | 100  | 100  | 100             | 100 | 100 | 100 | 100 | 100             | 86.8 | 80   | 83.2 | 95.9 |
| 5     | 65  | 100            | 100  | 100 | 100  | 100  | 100            | 100  | 100  | 100  | 100  | 100             | 100 | 100 | 100 | 100 | 100             | 84.5 | 77.7 | 83.6 | 95   |
| 6     | 68  | 100            | 100  | 100 | 100  | 100  | 100            | 100  | 100  | 100  | 100  | 100             | 100 | 100 | 100 | 100 | 100             | 87.3 | 80.5 | 83.2 | 96.4 |
| 7     | 74  | 100            | 100  | 100 | 100  | 100  | 100            | 100  | 100  | 100  | 100  | 100             | 100 | 100 | 100 | 100 | 100             | 87.3 | 80   | 83.6 | 96.8 |
| 8     | 78  | 100            | 100  | 100 | 100  | 100  | 100            | 100  | 100  | 100  | 100  | 100             | 100 | 100 | 100 | 100 | 100             | 87.3 | 80   | 83.6 | 97.3 |
| 9     | 86  | 100            | 100  | 100 | 100  | 100  | 100            | 100  | 100  | 100  | 100  | 100             | 100 | 100 | 100 | 100 | 100             | 85.9 | 80   | 83.6 | 96.8 |
| 10    | 95  | 100            | 100  | 100 | 100  | 100  | 100            | 100  | 100  | 100  | 100  | 100             | 100 | 100 | 100 | 100 | 100             | 86.8 | 79.5 | 83.6 | 97.3 |
| 11    | 114 | 100            | 100  | 100 | 100  | 100  | 100            | 100  | 100  | 100  | 100  | 100             | 100 | 100 | 100 | 100 | 100             | 86.8 | 79.5 | 83.6 | 96.8 |
| 12    | 149 | 100            | 100  | 100 | 100  | 100  | 100            | 100  | 100  | 100  | 100  | 100             | 100 | 100 | 100 | 100 | 100             | 85.9 | 80   | 82.7 | 95   |
| 13    | 221 | 100            | 100  | 100 | 100  | 100  | 100            | 100  | 100  | 100  | 100  | 100             | 100 | 100 | 100 | 100 | 100             | 86.4 | 79.5 | 81.8 | 93.2 |
| 14    | 246 | 100            | 100  | 100 | 100  | 100  | 100            | 100  | 100  | 100  | 100  | 100             | 100 | 100 | 100 | 100 | 100             | 86.8 | 80.5 | 82.7 | 97.7 |
| 15    | 259 | 100            | 100  | 100 | 100  | 100  | 100            | 100  | 100  | 100  | 100  | 100             | 100 | 100 | 100 | 100 | 100             | 86.4 | 80   | 83.2 | 96.4 |
| Donor |     | mean M1 and M2 |      |     |      |      | mean M3-6 F1-5 |      |      |      |      | mean all donors |     |     |     |     |                 |      |      |      |      |
| CpG   | nt  | #1             | #2   | #3  | #4   | #5   | #1             | #2   | #3   | #4   | #5   | #1              | #2  | #3  | #4  | #5  | #1              | #2   | #3   | #4   | #5   |
| 1     | 1   | N/A            | 50   | 0   | 12.5 | 87.5 | 100            | 95   | 97.8 | 98.9 | 98.3 | 100             | 100 | 100 | 100 | 100 | 100             | 86.8 | 80   | 83.2 | 96.4 |
| 2     | 6   | N/A            | 47.5 | 0   | 7.5  | 82.5 | 100            | 96.1 | 97.8 | 99.4 | 99.4 | 100             | 100 | 100 | 100 | 100 | 100             | 87.3 | 80   | 82.7 | 96.4 |
| 3     | 47  | N/A            | 50   | 0   | 10   | 85   | 100            | 95   | 97.2 | 99.4 | 99.4 | 100             | 100 | 100 | 100 | 100 | 100             | 86.8 | 79.5 | 83.2 | 96.8 |
| 4     | 55  | N/A            | 45   | 0   | 12.5 | 80   | 100            | 96.1 | 97.8 | 98.9 | 99.4 | 100             | 100 | 100 | 100 | 100 | 100             | 86.8 | 80   | 83.2 | 95.9 |
| 5     | 65  | N/A            | 45   | 0   | 15   | 85   | 100            | 93.3 | 95   | 98.9 | 97.2 | 100             | 100 | 100 | 100 | 100 | 100             | 84.5 | 77.7 | 83.6 | 95   |
| 6     | 68  | N/A            | 47.5 | 2.5 | 12.5 | 85   | 100            | 96.1 | 97.8 | 98.9 | 98.9 | 100             | 100 | 100 | 100 | 100 | 100             | 87.3 | 80.5 | 83.2 | 96.4 |
| 7     | 74  | N/A            | 47.5 | 0   | 12.5 | 87.5 | 100            | 96.1 | 97.8 | 99.4 | 98.9 | 100             | 100 | 100 | 100 | 100 | 100             | 87.3 | 80   | 83.6 | 96.8 |
| 8     | 78  | N/A            | 47.5 | 0   | 12.5 | 90   | 100            | 96.1 | 97.8 | 99.4 | 98.9 | 100             | 100 | 100 | 100 | 100 | 100             | 87.3 | 80   | 83.6 | 97.3 |
| 9     | 86  | N/A            | 47.5 | 0   | 12.5 | 87.5 | 100            | 94.4 | 97.8 | 99.4 | 100  | 100             | 100 | 100 | 100 | 100 | 100             | 85.9 | 80   | 83.6 | 96.8 |
| 10    | 95  | N/A            | 47.5 | 0   | 12.5 | 87.5 | 100            | 95.6 | 97.2 | 99.4 | 99.4 | 100             | 100 | 100 | 100 | 100 | 100             | 86.8 | 79.5 | 83.6 | 97.3 |
| 11    | 114 | N/A            | 47.5 | 0   | 12.5 | 87.5 | 100            | 95.6 | 97.2 | 99.4 | 98.9 | 100             | 100 | 100 | 100 | 100 | 100             | 86.8 | 79.5 | 83.6 | 96.8 |
| 12    | 149 | N/A            | 50   | 0   | 12.5 | 77.5 | 100            | 93.9 | 97.8 | 98.3 | 98.9 | 100             | 100 | 100 | 100 | 100 | 100             | 85.9 | 80   | 82.7 | 95   |
| 13    | 221 | N/A            | 50   | 2.5 | 5    | 77.5 | 100            | 94.4 | 96.7 | 98.9 | 96.7 | 100             | 100 | 100 | 100 | 100 | 100             | 86.4 | 79.5 | 81.8 | 93.2 |
| 14    | 246 | N/A            | 55   | 2.5 | 10   | 95   | 100            | 93.9 | 97.8 | 98.9 | 98.3 | 100             | 100 | 100 | 100 | 100 | 100             | 86.8 | 80.5 | 82.7 | 97.7 |
| 15    | 259 | N/A            | 52.5 | 2.5 | 12.5 | 90   | 100            | 93.9 | 97.2 | 98.9 | 97.8 | 100             | 100 | 100 | 100 | 100 | 100             | 86.4 | 80   | 83.2 | 96.4 |
| mean  |     | N/A            | 48.7 | 0.7 | 11.5 | 85.7 | 100            | 95   | 97.4 | 99.1 | 98.7 | 100             | 100 | 100 | 100 | 100 | 100             | 86.6 | 79.8 | 83.2 | 96.3 |



| Foxp3 TSDR Top 700bp/500bp |     |      |      |      |      |      |      |      |      | Foxp3 TSDR Top/Reverse Strands 700bp |    |      |     |    |     |      |     |    |     |    |     |      |     |
|----------------------------|-----|------|------|------|------|------|------|------|------|--------------------------------------|----|------|-----|----|-----|------|-----|----|-----|----|-----|------|-----|
| Donor                      |     | M2   |      |      |      | F2   |      |      |      | M2                                   |    |      |     | F1 |     |      |     | M4 |     |    |     |      |     |
| subset                     | #3  | #3   | #5   | #5   | #2   | #2   | #5   | #5   | #3   | #3                                   | #5 | #5   | #3  | #3 | #5  | #5   | #2  | #2 | #4  | #4 | #5  | #5   |     |
| CpG                        | nt  | T700 | T500 | T700 | T500 | T700 | T500 | T700 | T500 | TS                                   | RS | TS   | RS  | TS | RS  | TS   | RS  | TS | RS  | TS | RS  | TS   | RS  |
| 1                          | 1   | 0    | 0    | 100  | 90   | 10   | 20   | 100  | 90   | 0                                    | 0  | 100  | 100 | 60 | 100 | 100  | 100 | 0  | 100 | 0  | 100 | 100  | 100 |
| 2                          | 6   | 10   | 0    | 100  | 100  | 0    | 20   | 90   | 80   | 0                                    | 0  | 100  | 100 | 60 | 100 | 100  | 100 | 0  | 100 | 0  | 100 | 100  | 100 |
| 3                          | 47  | 0    | 0    | 100  | 90   | 10   | 20   | 100  | 100  | 0                                    | 0  | 80   | 100 | 40 | 100 | 90   | 100 | 0  | 100 | 0  | 100 | 100  | 100 |
| 4                          | 55  | 0    | 0    | 100  | 100  | 10   | 20   | 100  | 100  | 0                                    | 0  | 100  | 100 | 60 | 100 | 100  | 100 | 0  | 100 | 0  | 100 | 100  | 100 |
| 5                          | 65  | 0    | 0    | 100  | 100  | 0    | 20   | 100  | 100  | 0                                    | 0  | 90   | 100 | 60 | 100 | 80   | 100 | 0  | 100 | 0  | 100 | 100  | 100 |
| 6                          | 68  | 0    | 0    | 100  | 90   | 0    | 20   | 100  | 100  | 0                                    | 0  | 100  | 100 | 60 | 100 | 100  | 100 | 0  | 100 | 0  | 100 | 100  | 100 |
| 7                          | 74  | 0    | 0    | 100  | 100  | 0    | 20   | 100  | 100  | 10                                   | 0  | 30   | 100 | 20 | 100 | 70   | 100 | 0  | 100 | 10 | 100 | 90   | 100 |
| 8                          | 78  | 0    | 0    | 100  | 100  | 0    | 20   | 100  | 100  | 0                                    | 0  | 100  | 100 | 70 | 100 | 100  | 100 | 0  | 100 | 0  | 100 | 100  | 100 |
| 9                          | 86  | 20   | 0    | 100  | 100  | 0    | 20   | 100  | 80   | 0                                    | 0  | 100  | 100 | 80 | 100 | 100  | 100 | 0  | 100 | 0  | 100 | 100  | 100 |
| 10                         | 95  | 0    | 0    | 100  | 100  | 0    | 20   | 90   | 100  | 0                                    | 0  | 90   | 100 | 70 | 100 | 100  | 100 | 0  | 100 | 0  | 100 | 100  | 100 |
| 11                         | 114 | 0    | 0    | 100  | 100  | 10   | 20   | 100  | 100  | 0                                    | 0  | 100  | 100 | 60 | 100 | 90   | 100 | 0  | 100 | 0  | 100 | 100  | 100 |
| 12                         | 149 | 0    | 0    | 90   | 90   | 20   | 0    | 60   | 60   | 0                                    | 0  | 100  | 100 | 60 | 100 | 60   | 100 | 0  | 100 | 0  | 100 | 100  | 100 |
| 13                         | 221 | 0    | 0    | 90   | 70   | 10   | 20   | 70   | 40   | 0                                    | 0  | 100  | 100 | 60 | 100 | 50   | 100 | 0  | 100 | 0  | 100 | 80   | 100 |
| 14                         | 246 | 0    | 0    | 100  | 100  | 40   | 20   | 90   | 100  | 0                                    | 0  | 100  | 100 | 70 | 100 | 90   | 100 | 0  | 100 | 0  | 100 | 100  | 100 |
| 15                         | 259 | 0    | 0    | 100  | 100  | 20   | 20   | 100  | 100  | 10                                   | 0  | 100  | 100 | 70 | 100 | 80   | 100 | 0  | 100 | 0  | 100 | 90   | 100 |
| mean all CpGs              |     | 2    | 0    | 98.7 | 95.3 | 8.7  | 18.7 | 93.3 | 90   | 1.3                                  | 0  | 92.7 | 100 | 60 | 100 | 87.3 | 100 | 0  | 100 | 0  | 100 | 97.3 | 100 |

| Foxp3 TSDR Top/Reverse Strands 700bp |     |    |     |    |     |      |     |     |     |    |     |      |     |      |     |      |     |      |     |     |     |     |     |     |
|--------------------------------------|-----|----|-----|----|-----|------|-----|-----|-----|----|-----|------|-----|------|-----|------|-----|------|-----|-----|-----|-----|-----|-----|
| Donor                                |     | M6 |     |    |     |      |     | F3  |     |    |     |      |     | F4   |     |      |     |      |     |     |     |     |     |     |
| subset                               | #2  | #2 | #4  | #4 | #5  | #5   | #2  | #2  | #4  | #4 | #5  | #5   | #2  | #2   | #4  | #4   | #5  | #5   | #2  | #2  | #4  | #4  | #5  | #5  |
| CpG                                  | TS  | RS | TS  | RS | TS  | RS   | TS  | RS  | TS  | RS | TS  | RS   | TS  | RS   | TS  | RS   | TS  | RS   | TS  | RS  | TS  | RS  | TS  | RS  |
| 1                                    | 1   | 0  | 100 | 60 | 100 | 100  | 100 | 0   | 100 | 0  | 100 | 100  | 100 | 50   | 100 | 100  | 100 | 100  | 100 | 100 | 100 | 100 | 100 | 100 |
| 2                                    | 6   | 0  | 100 | 60 | 100 | 100  | 100 | 0   | 100 | 0  | 100 | 90   | 100 | 50   | 100 | 100  | 100 | 100  | 100 | 100 | 100 | 100 | 100 | 100 |
| 3                                    | 47  | 0  | 100 | 60 | 100 | 100  | 100 | 0   | 100 | 0  | 100 | 100  | 100 | 50   | 100 | 100  | 100 | 100  | 100 | 100 | 100 | 100 | 100 | 100 |
| 4                                    | 55  | 0  | 100 | 60 | 100 | 100  | 100 | 0   | 100 | 0  | 100 | 90   | 100 | 50   | 100 | 100  | 100 | 100  | 100 | 100 | 100 | 100 | 100 | 100 |
| 5                                    | 65  | 0  | 100 | 60 | 100 | 100  | 100 | 0   | 100 | 0  | 100 | 100  | 100 | 50   | 100 | 100  | 100 | 100  | 100 | 100 | 100 | 100 | 100 | 100 |
| 6                                    | 68  | 0  | 100 | 60 | 100 | 100  | 100 | 0   | 100 | 0  | 100 | 90   | 100 | 50   | 100 | 100  | 100 | 100  | 100 | 100 | 100 | 100 | 100 | 100 |
| 7                                    | 74  | 0  | 100 | 50 | 100 | 100  | 100 | 20  | 100 | 30 | 100 | 80   | 100 | 50   | 100 | 70   | 100 | 50   | 100 | 100 | 100 | 100 | 100 | 100 |
| 8                                    | 78  | 0  | 100 | 60 | 100 | 100  | 100 | 0   | 100 | 0  | 100 | 100  | 100 | 50   | 100 | 100  | 100 | 100  | 100 | 100 | 100 | 100 | 100 | 100 |
| 9                                    | 86  | 0  | 100 | 60 | 100 | 100  | 100 | 0   | 100 | 0  | 100 | 90   | 100 | 50   | 100 | 100  | 100 | 100  | 100 | 100 | 100 | 100 | 100 | 100 |
| 10                                   | 95  | 0  | 100 | 60 | 100 | 100  | 100 | 0   | 100 | 0  | 100 | 100  | 100 | 50   | 100 | 100  | 100 | 100  | 100 | 100 | 100 | 100 | 100 | 100 |
| 11                                   | 114 | 0  | 100 | 70 | 100 | 100  | 100 | 0   | 100 | 0  | 100 | 100  | 100 | 50   | 100 | 100  | 100 | 100  | 100 | 100 | 100 | 100 | 100 | 100 |
| 12                                   | 149 | 0  | 100 | 70 | 100 | 90   | 100 | 0   | 100 | 0  | 100 | 80   | 100 | 0    | 100 | 50   | 100 | 80   | 100 | 100 | 100 | 100 | 100 | 100 |
| 13                                   | 221 | 0  | 100 | 60 | 100 | 100  | 100 | 0   | 100 | 0  | 100 | 80   | 100 | 40   | 100 | 100  | 100 | 100  | 100 | 100 | 100 | 100 | 100 | 100 |
| 14                                   | 246 | 0  | 100 | 70 | 100 | 100  | 100 | 0   | 100 | 0  | 100 | 100  | 100 | 40   | 100 | 100  | 100 | 100  | 100 | 100 | 100 | 100 | 100 | 100 |
| 15                                   | 259 | 0  | 100 | 70 | 100 | 100  | 100 | 0   | 100 | 0  | 100 | 100  | 100 | 40   | 100 | 100  | 100 | 100  | 100 | 100 | 100 | 100 | 100 | 100 |
| mean all CpGs                        |     | 0  | 100 | 62 | 100 | 99.3 | 100 | 1.3 | 100 | 2  | 100 | 93.3 | 100 | 44.7 | 100 | 94.7 | 100 | 91.3 | 100 |     |     |     |     |     |

**Supplementary Table 3.** Methylation percentages for *CAMTA1*, *FUT7*, *FOXP3* enhancer, preTSDR, promoter and TSDR regions in five cell populations of donors M1-6 and F1-5. Methylation percentages for individual CpG sites were calculated based on the number of <sup>m</sup>Cs in a total of 20 sequences unless otherwise stated. CpGs in each amplicon are numbered relative to the 5'-3' direction of the coding strand with CpG 1 denoted nucleotide (nt) position 1. The five cell subsets are: #1 (CD34<sup>+</sup>), #2 (CD45RA<sup>+</sup>CD15s<sup>-</sup>), #3 (CD45RA<sup>-</sup>CD15s<sup>-</sup>), #4 (CD45RA<sup>-</sup>CD15s<sup>+</sup>) and #5 (Tcon). TS- top strand, RS – reverse strand

| <b>Human <i>FOXP3</i> TSDR</b>  |                 |               |
|---------------------------------|-----------------|---------------|
| <b>Reference</b>                | <b>Based on</b> | <b>Strand</b> |
| (1)                             | Primers         | Top           |
| (2)                             | Primers         | Reverse       |
| (3)                             | Primers         | Top           |
| (4)                             | Primers         | Reverse/Top   |
| (5)                             | Primers         | Top           |
| (6)                             | Primers         | Reverse       |
| (7)                             | (1)             | Top           |
| (8)                             | (5)             | Top           |
| (9)                             | (5)             | Top           |
| (10)                            | (5)             | Top           |
| (11)                            | (5)             | Top           |
| (12)                            | (5)             | Top           |
| (13)                            | Primers         | Reverse/Top   |
| (14)                            | Primers         | Reverse       |
| (15)                            | Primers         | Top           |
| (16)                            | (5)             | Top           |
| (17)                            | (4)             | Top           |
| (18)                            | (5)             | Top           |
| (19)                            | Primers         | Top           |
| (20)                            | Primers         | Top           |
| (21)                            | Primers         | Top           |
| (22)                            | (1)             | Top           |
| (23)                            | Primers         | Top           |
| (24)                            | Primers         | Reverse       |
| (25)                            | (5)             | Top           |
| (26)                            | (5)             | Top           |
| (27)                            | EpigenDx        | ---           |
| (28)                            | (1)             | Top           |
| (29)                            | (1)             | Top           |
| (30)                            | Primers         | Reverse       |
| (31)                            | Primers         | Reverse       |
| (32)                            | (5) and primers | Top           |
| (33)                            | (5)             | Top           |
| (34)                            | Primers         | Top           |
| (35)                            | (5)             | Top           |
| (36)                            | Primers         | Top           |
| <b>Murine <i>FOXP3</i> TSDR</b> |                 |               |
| (37)                            | Primers         | Reverse       |
| (38)                            | (37)            | Reverse       |
| (39)                            | Primers         | Top           |
| (40)                            | Primers         | Top           |
| (41)                            | EpigenDx        | ---           |
| (42)                            | EpigenDx        | ---           |
| (43)                            | Primers         | Reverse       |
| (44)                            | Primers         | Reverse       |
| (45)                            | (40, 44)        | Top, Reverse  |
| (46)                            | (37)            | Reverse       |
| (47)                            | Primers         | Top           |
| (48)                            | Primers         | Top           |

|                                    |            |              |
|------------------------------------|------------|--------------|
| (49)                               | Primers    | Top          |
| (50)                               | Primers    | Reverse /Top |
| (51)                               | (43)       | Reverse      |
| (52)                               | (39), (43) | Top, Reverse |
| (53)                               | Primers    | Top          |
| (54)                               | Primers    | Top          |
| (55)                               | Primers    | Top          |
| <b>Human <i>FOXP3</i> Promoter</b> |            |              |
| (38)                               | Primers    | Top          |
| (56)                               | Primers    | Top          |
| (2)                                | Primers    | Reverse      |
| (3)                                | Primers    | Top          |
| (57)                               | Primers    | Top          |
| (6)                                | Primers    | Reverse      |
| (13)                               | Primers    | Reverse      |
| (19)                               | Primers    | Top          |
| (21)                               | Primers    | Reverse      |
| (25)                               | Primers    | Top          |
| (58)                               | Primers    | Reverse      |
| (59)                               | Primers    | Top          |
| (60)                               | Primers    | Reverse      |
| (61)                               | Primers    | Top          |

**Supplementary Table 4.** Studies that used human and murine *FOXP3* TSDR and promoter regions. Template strands used to detect methylation status of the two regions were identified using primer sequences supplied in the article or *via* reference (which then had primer sequence) used in Methodology section when primer sequences were not available

## Supplementary References

1. Baron U, Floess S, Wieczorek G, Baumann K, Grützkau A, Dong J, Thiel A, Boeld TJ, Hoffmann P, Edinger M, et al. DNA demethylation in the human FOXP3 locus discriminates regulatory T cells from activated FOXP3<sup>+</sup> conventional T cells. *Eur J Immunol* (2007) **37**:2378–2389. doi:10.1002/eji.200737594
2. Miyara M, Yoshioka Y, Kitoh A, Shima T, Wing K, Niwa A, Parizot C, Taflin C, Heike T, Valeyre D, et al. Functional Delineation and Differentiation Dynamics of Human CD4<sup>+</sup> T Cells Expressing the FoxP3 Transcription Factor. *Immunity* (2009) **30**:899–911. doi:10.1016/j.immuni.2009.03.019
3. Schmidl C, Klug M, Boeld T, Andreesen R, Hoffmann P, Edinger M, Rehli M. Lineage-specific DNA methylation in T cells correlates with histone methylation and enhancer activity. *Genome Res* (2009) **19**:1165–1174. doi:10.1101/gr.091470.109.19
4. Stockis J, Fink W, Francois V, Connerotte T, de Smet C, Knoops L, van der Bruggen P, Boon T, Coulie PG, Lucas S. Comparison of stable human Treg and Th clones by transcriptional profiling. *Eur J Immunol* (2009) **39**:869–882. doi:10.1002/eji.200838807
5. Wieczorek G, Asemissen A, Model F, Turbachova I, Floess S, Liebenberg V, Baron U, Stauch D, Kotsch K, Pratschke J, et al. Quantitative DNA methylation analysis of FOXP3 as a new method for counting regulatory T cells in peripheral blood and solid tissue. *Cancer Res* (2009) **69**:599–608. doi:10.1158/0008-5472.CAN-08-2361
6. Nadeau K, McDonald-Hyman C, Noth EM, Pratt B, Hammond SK, Balmes J, Tager I. Ambient air pollution impairs regulatory T-cell function in asthma. *J Allergy Clin Immunol* (2010) **126**:845–852.e10. doi:10.1016/j.jaci.2010.08.008
7. Kehrmann J, Zeschnigk M, Buer J, Probst-Kepper M. FOXP3 expression in GARP-transduced helper T cells is not associated with FOXP3 TSDR demethylation. *Transfus Med Hemotherapy* (2011) **38**:287–291. doi:10.1159/000331499
8. McClymont SA, Putnam AL, Lee MR, Esensten JH, Liu W, Hulme MA, Hoffmüller U, Baron U, Olek S, Bluestone JA, et al. Plasticity of Human Regulatory T Cells in Healthy Subjects and Patients with Type 1 Diabetes. *J Immunol* (2011) **186**:3918–3926. doi:10.4049/jimmunol.1003099.Plasticity
9. Ukena SN, Höpting M, Velaga S, Ivanyi P, Grosse J, Baron U, Ganser A, Franzke A. Isolation strategies of regulatory T cells for clinical trials: Phenotype, function, stability, and expansion capacity. *Exp Hematol* (2011) **39**:1152–1160. doi:10.1016/j.exphem.2011.08.010
10. Hinz D, Bauer M, Röder S, Olek S, Huehn J, Sack U, Borte M, Simon JC, Lehmann I, Herberth G. Cord blood Tregs with stable FOXP3 expression are influenced by prenatal environment and associated with atopic dermatitis at the age of one year. *Allergy Eur J Allergy Clin Immunol* (2012) **67**:380–389. doi:10.1111/j.1398-9995.2011.02767.x
11. Stauch D, Yahyazadeh A, Bova R, Melloh G-C, Földner A, Baron U, Olek S, Göldner K, Weiss S, Pratschke J, et al. Induction of bona fide regulatory T cells after liver transplantation - the potential influence of polyclonal antithymocyte globulin. *Transpl*

- Int* (2012) **25**:302–313. doi:10.1111/j.1432-2277.2011.01405.x
12. Barzaghi F, Passerini L, Gambineri E, Ciullini Mannurita S, Cornu T, Kang ES, Choe YH, Cancrini C, Corrente S, Ciccocioppo R, et al. Demethylation analysis of the FOXP3 locus shows quantitative defects of regulatory T cells in IPEX-like syndrome. *J Autoimmun* (2012) **38**:49–58. doi:10.1016/j.jaut.2011.12.009
  13. Lucas S, Van Baren N, De Smet C, Coulie PG. Demethylation of the FOXP3 gene in human melanoma cells precludes the use of this epigenetic mark for quantification of Tregs in unseparated melanoma samples. *Int J Cancer* (2012) **130**:1960–1966. doi:10.1002/ijc.26198
  14. Tatura R, Zeschnigk M, Adamzik M, Probst-Kepper M, Buer J, Kehrmann J. Quantification of Regulatory T Cells in Septic Patients by Real-Time PCR-Based Methylation Assay and Flow Cytometry. *PLoS One* (2012) **7**:1–9. doi:10.1371/journal.pone.0049962
  15. Bacher N, Raker V, Hofmann C, Graulich E, Schwenk M, Baumgrass R, Bopp T, Zechner U, Merten L, Becker C, et al. Interferon- $\alpha$  suppresses cAMP to disarm human regulatory T cells. *Cancer Res* (2013) **73**:5647–5656. doi:10.1158/0008-5472.CAN-12-3788
  16. Engela AU, Hoogduijn MJ, Boer K, Litjens NHR, Betjes MGH, Weimar W, Baan CC. Human adipose-tissue derived mesenchymal stem cells induce functional de-novo regulatory T cells with methylated FOXP3 gene DNA. *Clin Exp Immunol* (2013) **173**:343–354. doi:10.1111/cei.12120
  17. Anderson MR, Enose-Akahata Y, Massoud R, Ngouth N, Tanaka Y, Oh U, Jacobson S. Epigenetic modification of the FoxP3 TSDR in HAM/TSP decreases the functional suppression of Tregs. *J Neuroimmune Pharmacol* (2014) **9**:522–532. doi:10.1007/s11481-014-9547-z
  18. Angin M, Klarenbeek PL, King M, Sharma SM, Moodley ES, Rezai A, Piechocka-Trocha A, Toth I, Chan AT, Goulder PJ, et al. Regulatory T cells expanded from HIV-1-infected individuals maintain phenotype, TCR repertoire and suppressive capacity. *PLoS One* (2014) **9**: doi:10.1371/journal.pone.0086920
  19. Bending D, Pesenacker AM, Ursu S, Wu Q, Lom H, Thirugnanabalan B, Wedderburn LR. Hypomethylation at the Regulatory T Cell–Specific Demethylated Region in CD25<sup>hi</sup> T Cells Is Decoupled from FOXP3 Expression at the Inflamed Site in Childhood Arthritis. *J Immunol* (2014) **193**:2699–2708. doi:10.4049/jimmunol.1400599
  20. Kehrmann J, Tatura R, Zeschnigk M, Probst-Kepper M, Geffers R, Steinmann J, Buer J. Impact of 5-aza-2'-deoxycytidine and epigallocatechin-3-gallate for induction of human regulatory T cells. *Immunology* (2014) **142**:384–395. doi:10.1111/imm.12261
  21. Kennedy A, Schmidt EM, Cribbs AP, Penn H, Amjadi P, Syed K, Read JE, Green P, Gregory B, Brennan FM. A novel upstream enhancer of FOXP3, sensitive to methylation-induced silencing, exhibits dysregulated methylation in rheumatoid arthritis Treg cells. *Eur J Immunol* (2014) **44**:2968–2978. doi:10.1002/eji.201444453
  22. Parmar S, Liu X, Tung SS, Robinson SN, Rodriguez G, Cooper LNJ, Yang H, Shah N,

- Yang H, Konopleva M, et al. Third-party umbilical cord blood-derived regulatory T cells prevent xenogenic graft-versus-host disease. *Cytotherapy* (2014) **16**:90–100. doi:10.1016/j.jcyt.2013.07.009
23. Spreafico R, Rossetti M, van den Broek T, Jansen NJG, Zhang H, Moshref M, Prakken B, van Loosdregt J, van Wijk F, Albani S. A sensitive protocol for FOXP3 epigenetic analysis in scarce human samples. *Eur J Immunol* (2014) **44**:3141–3143. doi:10.1002/eji.201444627
  24. Zhuo C, Li Z, Xu Y, Wang Y, Li Q, Peng J, Zheng H, Wu P, Li B, Cai S. Higher FOXP3-TSDR demethylation rates in adjacent normal tissues in patients with colon cancer were associated with worse survival. *Mol Cancer* (2014) **13**:153. doi:10.1186/1476-4598-13-153
  25. Bégin P, Schulze J, Baron U, Olek S, Bauer RN, Passerini L, Baccheta R, Nadeau KC. Human in vitro induced T regulatory cells and memory T cells share common demethylation of specific FOXP3 promoter region. *Clin Transl Allergy* (2015) **5**:35. doi:10.1186/s13601-015-0079-2
  26. Braza F, Dugast E, Panov I, Paul C, Vogt K, Pallier A, Chesneau M, Baron D, Guerif P, Lei H, et al. Central Role of CD45RA- Foxp3hi Memory Regulatory T Cells in Clinical Kidney Transplantation Tolerance. *J Am Soc Nephrol* (2015) **26**:1795–1805. doi:10.1681/ASN.2014050480
  27. Daniel V, Trojan K, Adamek M, Opelz G. IFN $\gamma$ + Treg in-vivo and in-vitro represent both activated nTreg and peripherally induced aTreg and remain phenotypically stable in-vitro after removal of the stimulus. *BMC Immunol* (2015) **16**:45. doi:10.1186/s12865-015-0111-2
  28. Muller M, Herrath J, Malmstro, M V. IL-1R1 is expressed on both Helios+ and Helios-FoxP3+CD4+ T cells in the rheumatic joint. *Clin Exp Immunol* (2015) **182**:90–100. doi:10.1111/cei.12668
  29. Roesner LM, Floess S, Witte T, Olek S, Huehn J, Werfel T. Foxp3<sup>+</sup> regulatory T cells are expanded in severe atopic dermatitis patients. *Allergy* (2015) **70**:n/a-n/a. doi:10.1111/all.12712
  30. Guo H, Zheng M, Zhang K, Yang F, Zhang X, Han Q, Chen ZN, Zhu P. Functional defects in CD4(+) CD25(high) FoxP3(+) regulatory cells in ankylosing spondylitis. *Sci Rep* (2016) **6**:37559. doi:10.1038/srep37559
  31. Lu CH, Wu CJ, Chan CC, Nguyen DT, Lin KR, Lin SJ, Chen LC, Yen JJY, Kuo ML. DNA methyltransferase inhibitor promotes human CD4+CD25hFOXP3+ regulatory T lymphocyte induction under suboptimal TCR stimulation. *Front Immunol* (2016) **7**:1–11. doi:10.3389/fimmu.2016.00488
  32. Metzker M, Shipkova M, von Ahsen N, Andag R, Abe M, Canzler O, Klett C, Leicht S, Olbricht C, Wieland E. Analytical evaluation of a real-time PCR-based DNA demethylation assay to assess the frequency of naturally occurring regulatory T cells in peripheral blood. *Clin Biochem* (2016) **49**:1173–1180. doi:10.1016/j.clinbiochem.2016.05.019
  33. Paparo L, Nocerino R, Cosenza L, Aitoro R, D'Argenio V, Del Monaco V, Di Scala C,

- Amoroso A, Di Costanzo M, Salvatore F, et al. Epigenetic features of FoxP3 in children with cow's milk allergy. *Clin Epigenetics* (2016) **8**:86. doi:10.1186/s13148-016-0252-z
34. Shimazu Y, Shimazu Y, Hishizawa M, Hamaguchi M, Nagai Y, Sugino N, Fujii S, Kawahara M, Kadowaki N, Nishikawa H, et al. Hypomethylation of the Treg-Specific Demethylated Region in FOXP3 Is a Hallmark of the Regulatory T-cell Subtype in Adult T-cell Leukemia. *Cancer Immunol Res* (2016) **4**:136–45. doi:10.1158/2326-6066.CIR-15-0148
  35. Arroyo Hornero R, Betts GJ, Sawitzki B, Vogt K, Harden PN, Wood KJ. CD45RA Distinguishes CD4+CD25+CD127–/low TSDR Demethylated Regulatory T Cell Subpopulations With Differential Stability and Susceptibility to Tacrolimus-Mediated Inhibition of Suppression. *Transplantation* (2017) **101**:302–309. doi:10.1097/TP.0000000000001278
  36. Salazar EKA, Cortés-Hernández A, Alemán-Muench GR, Alberú J, Rodríguez-Aguilera JR, Recillas-Targa F, de Sánchez VC, Cuevas E, Mancilla-Urrea E, García MP, et al. Methylation of FOXP3 TSDR underlies the impaired suppressive function of tregs from long-term belatacept-treated kidney transplant patients. *Front Immunol* (2017) **8**:1–15. doi:10.3389/fimmu.2017.00219
  37. Floess S, Freyer J, Siewert C, Baron U, Olek S, Polansky J, Schlawe K, Chang HD, Bopp T, Schmitt E, et al. Epigenetic control of the foxp3 locus in regulatory T cells. *PLoS Biol* (2007) **5**:0169–0178. doi:10.1371/journal.pbio.0050038
  38. Polansky JK, Kretschmer K, Freyer J, Floess S, Garbe A, Baron U, Olek S, Hamann A, von Boehmer H, Huehn J. DNA methylation controls Foxp3 gene expression. *Eur J Immunol* (2008) **38**:1654–1663. doi:10.1002/eji.200838105
  39. Kim H-P, Leonard WJ. CREB/ATF-dependent T cell receptor–induced *FoxP3* gene expression: a role for DNA methylation. *J Exp Med* (2007) **204**:1543–1551. doi:10.1084/jem.20070109
  40. Zhou X, Bailey-Bucktrout SL, Jeker LT, Penaranda C, Martínez-Llordella M, Ashby M, Nakayama M, Rosenthal W, Bluestone JA. Instability of the transcription factor Foxp3 leads to the generation of pathogenic memory T cells in vivo. *Nat Immunol* (2009) **10**:1000–1007. doi:10.1038/ni.1774
  41. Zheng Y, Josefowicz S, Chaudhry A, Peng XP, Forbush K, Rudensky AY. Role of conserved non-coding DNA elements in the Foxp3 gene in regulatory T-cell fate. *Nature* (2010) **463**:808–812. doi:10.1038/nature08750
  42. Sela U, Olds P, Park A, Schlesinger SJ, Steinman RM. Dendritic cells induce antigen-specific regulatory T cells that prevent graft versus host disease and persist in mice. *J Exp Med* (2011) **208**:2489–2496. doi:10.1084/jem.20110466
  43. Ohkura N, Hamaguchi M, Morikawa H, Sugimura K, Tanaka A, Ito Y, Osaki M, Tanaka Y, Yamashita R, Nakano N, et al. T Cell Receptor Stimulation-Induced Epigenetic Changes and Foxp3 Expression Are Independent and Complementary Events Required for Treg Cell Development. *Immunity* (2012) **37**:785–799. doi:10.1016/j.immuni.2012.09.010

44. Yadav M, Louvet C, Davini D, Gardner JM, Martinez-Llordella M, Bailey-Bucktrout S, Anthony BA, Sverdrup FM, Head R, Kuster DJ, et al. Neuropilin-1 distinguishes natural and inducible regulatory T cells among regulatory T cell subsets in vivo. *J Exp Med* (2012) **209**:1713–1722. doi:10.1084/jem.20120822
45. Bailey-Bucktrout SL, Martinez-Llordella M, Zhou X, Anthony B, Rosenthal W, Luche H, Fehling HJ, Bluestone JA. Self-antigen-Driven Activation Induces Instability of Regulatory T Cells during an Inflammatory Autoimmune Response. *Immunity* (2013) **39**:949–962. doi:10.1016/j.immuni.2013.10.016
46. Toker A, Engelbert D, Garg G, Polansky JK, Floess S, Miyao T, Baron U, Duber S, Geffers R, Giehr P, et al. Active Demethylation of the Foxp3 Locus Leads to the Generation of Stable Regulatory T Cells within the Thymus. *J Immunol* (2013) **190**:3180–3188. doi:10.4049/jimmunol.1203473
47. Feng Y, Arvey A, Chinen T, Van Der Veecken J, Gasteiger G, Rudensky AY. Control of the inheritance of regulatory T cell identity by a cis element in the foxp3 locus. *Cell* (2014) **158**:749–763. doi:10.1016/j.cell.2014.07.031
48. Nair VS, Oh KI. Down-regulation of Tet2 prevents TSDR demethylation in IL2 deficient regulatory T cells. *Biochem Biophys Res Commun* (2014) **450**:918–924. doi:10.1016/j.bbrc.2014.06.110
49. Schreiber L, Pietzsch B, Floess S, Farah C, Jansch L, Schmitz I, Huehn J. The Treg-specific demethylated region stabilizes Foxp3 expression independently of NF- $\kappa$ B signaling. *PLoS One* (2014) **9**: doi:10.1371/journal.pone.0088318
50. Tatura R, Zeschmigg M, Hansen W, Steinmann J, Vidigal PG, Hutzler M, Pastille E, Westendorf AM, Buer J, Kehrman J. Relevance of Foxp3<sup>+</sup> regulatory T cells for early and late phases of murine sepsis. *Immunology* (2015) **146**:144–56. doi:10.1111/imm.12490
51. Nair VS, Song MH, Ko M, Oh KI. DNA demethylation of the Foxp3 enhancer is maintained through modulation of Ten-Eleven-Translocation and DNA methyltransferases. *Mol Cells* (2016) **39**:888–897. doi:10.14348/molcells.2016.0276
52. Sasidharan Nair V, Song MH, Oh KI. Vitamin C Facilitates Demethylation of the Foxp3 Enhancer in a Tet-Dependent Manner. *J Immunol* (2016) **196**:2119–2131. doi:10.4049/jimmunol.1502352
53. Yue X, Trifari S, Äijö T, Tsagaratou A, Pastor WA, Zepeda-Martínez JA, Lio C-WJ, Li X, Huang Y, Vijayanand P, et al. Control of Foxp3 stability through modulation of TET activity. *J Exp Med* (2016) **213**:377–397. doi:10.1084/jem.20151438
54. Okada M, Kanamori M, Someya K, Nakatsukasa H, Yoshimura A. Stabilization of Foxp3 expression by CRISPR-dCas9-based epigenome editing in mouse primary T cells. *Epigenetics Chromatin* (2017) **10**:24. doi:10.1186/s13072-017-0129-1
55. Wu D, Luo Y, Guo W, Niu Q, Xue T, Yang F, Sun X, Chen S, Liu Y, Liu J, et al. Lkb1 maintains Treg cell lineage identity. *Nat Commun* (2017) **8**:15876. doi:10.1038/ncomms15876
56. Janson PCJ, Winerdal ME, Marits P, Thörn M, Ohlsson R, Winqvist O. FOXP3



- promoter demethylation reveals the committed Treg population in humans. *PLoS One* (2008) **3**: doi:10.1371/journal.pone.0001612
57. Lei J, Hasegawa H, Matsumoto T, Yasukawa M. Peroxisome Proliferator-Activated Receptor and Agonists Together with TGF- Convert Human CD4+CD25- T Cells into Functional Foxp3+ Regulatory T Cells. *J Immunol* (2010) **185**:7186–7198. doi:10.4049/jimmunol.1001437
  58. Hou W, Li Z, Li Y, Fang L, Li J, Huang J, Li X, You Z. Correlation between protein expression of FOXP3 and level of FOXP3 promoter methylation in recurrent spontaneous abortion. *J Obstet Gynaecol Res* (2016) **42**:1439–1444. doi:10.1111/jog.13076
  59. Prelog M, Hilligardt D, Schmidt CA, Przybylski GK, Leierer J, Almanzar G, Hajj N El, Lesch KP, Arolt V, Zwanzger P, et al. Hypermethylation of FOXP3 Promoter and Premature Aging of the Immune System in Female Patients with Panic Disorder? *PLoS One* (2016) **11**:1–14. doi:10.1371/journal.pone.0157930
  60. Lovinsky-Desir S, Jung KH, Jezioro JR, Torrone DZ, de Planell-Saguer M, Yan B, Perera FP, Rundle AG, Perzanowski MS, Chillrud SN, et al. Physical activity, black carbon exposure, and DNA methylation in the FOXP3 promoter. *Clin Epigenetics* (2017) **9**:65. doi:10.1186/s13148-017-0364-0
  61. Ugor E, Simon D, Almanzar G, Pap R, Najbauer J, Németh P, Balogh P, Prelog M, Czirják L, Berki T. Increased proportions of functionally impaired regulatory T cell subsets in systemic sclerosis. *Clin Immunol* (2017) doi:10.1016/j.clim.2017.05.013
